# Supplementary material for: Inferring methane emissions from African livestock by fusing drone, tower, and satellite data
Source: Copernicus journal article supplement (doi:10.5194/egusphere-2024-3994), 2025-01-09
Supplement: Supplementary file [file egusphere-2024-3994-AC1-supplement.pdf]

## REVIEWER # 1

We sincerely appreciate the reviewer for their careful reading of our manuscript and for providing insightful and constructive feedback. We would like to thank the reviewer for their thoughtful comments and valuable suggestions.

In the following responses, we address each comment systematically. We also include a revised version of the manuscript that highlights all changes.

### COMMENT # 1.1

*The authors present a comprehensive study on the estimation of methane emission rates from livestock in sub-Saharan Africa using a combination of drone, flux tower, and satellite data. They developed a Bayesian inference method to assimilate these observations into an atmospheric dispersion model and compared the methane emission rates of various livestock species, including cattle, goats, sheep, and camels, from the Bayesian inference method with estimates from a mass balance approach and IPCC Tier 1 and 2 approaches. The Bayesian inference method was found to be more robust at quantifying emissions from weaker sources than a mass balance approach. The results indicate that the Bayesian inference method is effective in quantifying methane emissions from different livestock species, with promising implications for improving emission inventories, especially for less studied livestock species such as camels.*

#### Reply:

We thank the reviewer for their positive feedback on our manuscript.

### COMMENT # 1.2

*In general, the paper is well prepared and well-reasoned. However, there are areas where the manuscript could be improved to enhance clarity and impact. The authors have studied the topic from many angles, and thus the manuscript would benefit from better structure and reorganization of some topics.*

#### Reply:

We appreciate the reviewer's constructive feedback. We have carefully considered the suggestions regarding its structure and organization. Specific responses addressing these points can be found in our replies to Comments # 1.3, # 1.4, and # 1.5

### COMMENT # 1.3

*In particular, I wondered about the value of using the PRISMA observations. It seemed to me that the development of the Bayesian inference approach was the main thing in this paper. The use of satellite observations felt a bit like an afterthought, especially since the authors could not use it as a validation of the Bayesian inference approach. Thus, I would suggest that the authors change the order of the paper so, that the sections discussing PRISMA observations would be the last, and that they would be introduced as a demonstration how it could potential be used to verify or upscale the Bayesian inference approach, similar how you state in P3, L77-80: "We apply two distinct methods: a traditional mass balance method and an innovative Bayesian inference approach that uses a sequential Monte Carlo method to invert an atmospheric diffusion model. To complement this analysis, we assess the capability of hyperspectral satellite data to pinpoint the location of CH<sub>4</sub> sources, specifically ruminant herds, by identifying spectral anomalies at the landscape level."*

#### **Reply:**

We thank the reviewer for their thoughtful suggestion regarding the organization of the manuscript. We agree that moving the section on satellite observations after the drone study improves clarity and coherence. We have implemented this reorganization and emphasized how the satellite analysis can complement the Bayesian inference approach using drones. The specific changes throughout the manuscript can be found in the revised version of the manuscript provided below this list of comment responses.

### COMMENT # 1.4

*I was also puzzled by the "4.1 Bayesian lessons learned" section. It was under the conclusion but introduced topics that were not properly discussed in the paper. It seems that the authors did a lot of testing with the models before settling on the setup explained in the manuscript. Such testing is desirable, and I appreciate that they report what worked and what did not. However, I think it should be discussed before the conclusions, or at least there could be a mention somewhere at the beginning that the lessons learned will be discussed at the end of the manuscript, for example similar to Saunois et al, 2024 (<https://doi.org/10.5194/essd-2024-115>). I would keep the conclusion section itself rather short and focused.*

#### **Reply:**

We thank the reviewer for their insight regarding the placement of the '4.1 Bayesian lessons learned' section. We acknowledge that this section was not optimally placed within the manuscript. As suggested by the reviewer, we have moved the section

to the end of Results & Discussion, prior to the Conclusions. We have included a reference to this section in Materials & Methods to provide better context. The reorganized and revised manuscript can be found below this list of comment responses.

---

**Changes:**

**2.1.2 Bayesian inference method**

...

The methodological challenges encountered during the implementation of the Bayesian inference method are discussed in Section 3.4.

COMMENT # 1.5

*I would also consider separating the Results and Discussion sections into two different ones.*

**Reply:**

We appreciate the reviewers suggestion to separate the sections. However, we believe that keeping them combined improves the coherence of the analysis, as it allows us to discuss the findings presented in the figures and table immediately.

COMMENT # 1.6

***Specific comments***

*P1, L17-18: “improvement of climate models”: I did not find a proper reasoning for how the methods developed in the paper would improve climate models. From my point of view, the major improvements would be within inventories and verifying other methods which estimate methane emissions. Please consider removing this or add reasoning for this.*

**Reply:**

We appreciate the reviewer’s comment on our manuscript. We intended to convey that these improvements could ultimately aid in calibrating climate models by improving the accuracy of methane source representation within the model. However, to maintain focus in the abstract, we have removed this part of the sentence and propose the following revision.

**Changes:**

## Abstract

...

The Bayesian observing system could thereby contribute to the ~~validation and~~ improvement of ~~climate models and~~ emission inventories and verification of other emission estimation methods.

## COMMENT # 1.7

*P2, L27: “a mass balance method with drone observations”: You mention later that this is an established method to estimate emissions using drone observation. You could mention it already here to highlight that the Bayesian approach is the novel aspect here.*

## Reply:

We thank the reviewer for their valuable suggestion. We propose to clarify this distinction throughout the manuscript as follows.

## Changes:

### 1 Introduction

...

We assess the efficacy and robustness of this novel method by comparing our results with those obtained from a conventional mass balance method and IPCC emission values.

...

To compare the results obtained from the novel Bayesian inference method with estimates from a more traditional mass balance method ...

...

### 2 Materials and methods

...

source term estimation through drone observations using an innovative particle-based Bayesian inference method ... source term estimation through drone observations using a traditional mass balance approach ...

...

### 3 Results and discussion

In this section, we compare the estimated emission rates derived from the novel Bayesian inference method with those obtained using a conventional mass balance method and IPCC Tier 2 values.

## COMMENT # 1.8



P2, L29: “Global mean atmospheric CH<sub>4</sub> concentrations surpassed 1.90 ppm in 2022”: You could update this value, especially since the study takes place in 2024.

**Reply:**

We thank the reviewer for their comment. We have updated the value to 1.93 ppm, reflecting the data for 2024. The percentage increase remains at 16% since 1985.

**Changes:**

**1 Introduction**

Global mean atmospheric CH<sub>4</sub> concentrations ~~surpassed 1.91 ppm in 2022~~ reached 1.93 ppm in 2024, marking a 16% increase since 1985 ...

COMMENT # 1.9

P3, L65: “On much larger spatial scales”: Much larger scales than herds and farms? Please, specify.

**Reply:**

We thank the reviewer to bringing this to our attention. To clarify, methods for detecting and quantifying methane sources from satellite data generally consider emission plumes extending over multiple pixels. We have added a typical spatial scale range for better understanding in the manuscript.

**Changes:**

**1 Introduction**

...

On ~~much~~ larger spatial scales, typically spanning several kilometers, satellite observations are used to detect and quantify CH<sub>4</sub> emissions from super-emitters, such as leaks from oil and gas production and large landfills ...

COMMENT # 1.10

P4, section “2.1 Satellite observations for source detection”: I would wish to have a better motivation why you are using observations from PRISMA and not from other satellites. Has it something to do with the spatial resolution and revisit time? Did you check if other satellites had observations over the study areas during the study period? Please, add at least a short description of the PRISMA satellite (spatial resolution and revisit time etc.).

**Reply:**

We chose to use PRISMA data because our project team had access to this satellite's observations, and the satellite overpass coincided with our drone campaign. This allowed us to accurately note the positions of the herds at the time of the satellite overpass. We have included the following additional details about the PRISMA satellite in the manuscript.

#### Changes:

### 2.3 Satellite observations for source detection

...

On 6 March 2024, the PRecursores IperSpettrale della Missione Applicativa (PRISMA) satellite (Loizzo et al., 2018) was commissioned to capture a hyperspectral image of Kapiti specifically for this research, while three cattle herds were present at different sites locations.

The PRISMA satellite has two hyperspectral sensors that ~~cover a spectral range from 400 nm to 2500 nm~~ measure solar radiation reflected by the Earth over 240 spectral bands, ranging from 400 nm to 2500 nm. Its spatial coverage is  $30 \times 30$  km<sup>2</sup>, with a resolution of 30 m.

COMMENT # 1.11

P4, L120: What is a "data cube"?

#### Reply:

We have added an explanation of what a 'data cube' is to the manuscript for clarification.

#### Changes:

### 2.3 Satellite observations for source detection

...

We processed the hyperspectral data of the PRISMA satellite in the infrared region to detect spatial variations in the CH<sub>4</sub> absorption feature. Starting from Level-1 top-of-atmosphere radiance narrowbands (Giardino et al., 2020), ~~infrared information 120 is integrated into single data cubes~~ we integrated the infrared information into single data cubes - composite images representing the same pixel across adjacent spectral bands - using the PRISMAread package in the R environment (Busetto and Ranghetti, 2020). This produces ~~s~~ hyperspectral data cubes consisting of 173 spectral bands, spanning infrared wavelengths from 920 nm to 2505 nm.

COMMENT # 1.12

P5, L139: You could mention already here why you have “one flight for each emission estimation method” and why the same flights cannot be used for both methods, i.e., they need different flight paths.

**Reply:**

We thank the reviewer for their question as it raises a topic of interest to us. We believe that flight path design is a valuable area for future research, and mention that “... makes intelligent sampling path design a promising topic for further study” in the Bayesian lessons learned section. For this study, we based our flight plans on prior knowledge. We have included information about the flight paths at the suggested location in the manuscript.

**Changes:**

**2.1 Drone-based source term estimation**

...

Typically, four flights were conducted for each ruminant herd. In the morning, before grazing, two flights were performed: one flight for each emission estimation method ~~, namely the Bayesian inference approach and a mass balance approach~~. The Bayesian inference flight focused on monitoring the downwind emission plume at various distances and altitudes from the source. In contrast, the mass balance flight, following Gålfalk et al. (2021), involved flying a virtual box around the source, capturing the differences in concentrations upwind and downwind from the source.

COMMENT # 1.13

P7, L184: What is “model inversion”?

**Reply:**

To clarify this concept, we have added an explanation in the manuscript.

**Changes:**

**2.1.2 Bayesian inference method**

...

The first drone-based method for quantifying CH<sub>4</sub> emission rates utilizes an inverse modeling approach ~~, which assimilates atmospheric measurements into an atmospheric transport model to infer emission rates~~. Model inversion involves estimating unknown input parameters of a theoretical model by utilizing observed data related to output parameters. We assimilate atmospheric measurements into an atmospheric

[transport model to infer emission rates.](#)

COMMENT # 1.14

*P7, L185: “Unlike optimization”: the word “optimization” is also used with Bayesian statistics and can include minimizing a cost function (see for example the references at the end of the chapter).*

**Reply:**

We thank the reviewer for pointing out this oversight in our wording. We propose to revise the manuscript as follows.

**Changes:**

### 2.1.2 Bayesian inference method

...

Two principal approaches are commonly employed in model inversion: (1) Several studies ([Andersen et al., 2021](#); [Shah et al., 2019, 2020](#)) minimize a cost function to find the best fit between a Gaussian plume model ([Sutton, 1947](#)) and observed CH<sub>4</sub> concentrations, [using a frequentist framework.](#) (2) In the field of robotics, various studies employ Bayesian inference for model inversion to estimate source emission rates and source locations, among other unknown variables, at local scales ([Hutchinson et al., 2017](#); [Francis et al., 2022](#)). ~~Unlike optimization,~~ The Bayesian approach is particularly well suited to solving ill-posed inverse problems involving the assimilation of noisy observations that are ubiquitous in geophysics ([Sanz-Alonso, 2023](#)).

COMMENT # 1.15

*P9, L233: “the threshold of 1.8 ppm”: This sounds a bit low compared to the global average (above 1.91 ppm in 2024, [https://gml.noaa.gov/ccgg/trends\\_ch4/](https://gml.noaa.gov/ccgg/trends_ch4/)). How did you settle on this value? You could also discuss more how the chosen background value affected the emission rate estimates.*

**Reply:**

The measured background concentrations in Kenya were lower than our background measurements in Norway before and after the field campaign, where we measured approximately 2.0 ppm, thereby ruling out severe drift in the instrument. Contact with the manufacturer confirmed that the discrepancy in background concentration cannot have been caused by atmospheric pressure differences. Furthermore, the manufacturer cannot detect any abnormalities in our data files or instrument settings.

This leaves us to believe that the measured low background concentration was natural.

We note that potential bias in the sensor readings does not impact the emission rate estimates in either drone method, as both methods rely on the elevated concentrations above the background level.

To provide additional clarity on how we settled on the chosen threshold value and its implications, we propose the following revisions in the manuscript.

## Changes:

### 2.1.2 Bayesian inference method

...

~~The mean background concentration for each drone flight is empirically determined by calculating the median of the CH<sub>4</sub> concentration observations that fall below the threshold of 1.8 ppm.~~

The peaks of the concentration histogram for each drone flight were below 1.8 ppm, and the mean background concentration  $c_0$  was determined as the median of CH<sub>4</sub> observations below this threshold. Although this value is lower than the global average of 1.93 ppm, measurements in Norway before and after the field campaign were close to the global average, and data inspection by the manufacturer revealed no sensor abnormalities, suggesting that this low value was natural. Addressing any remaining concerns, we note that both drone methods rely on concentration elevations above the background level, ensuring that any potential systematic bias does not affect the final estimates.

COMMENT # 1.16

P12, L333: “with a height of 10 m”: How did you settle on this height?

## Reply:

We selected a height of 10 m because we anticipated that this elevation would position the drone above the plume, allowing us to neglect any fluxes through the top horizontal plane (i.e., lid or roof) of the imaginary box. We obtained observations of the top horizontal plane to ensure that any fluxes there were negligible. If necessary, we could have incorporated the resulting fluxes from those measurements into the mass balance method. However, during data analysis, we confirmed that the drone remained above the plume for all flights, making it unnecessary to include the top horizontal plane in the mass balance method.

## COMMENT # 1.17

*P14, section “3.1 Source detection through satellite observations” As I mentioned before, I think this could be the last section. In addition, to make it more relevant, you could think of adding a simple correlation calculation, i.e. calculate how much each PRISMA pixel should have methane emissions based on the paper (emission rate x number of animals) and then see if there is any correlation between the SR anomalies. At least you could speculate more on how these satellite observations could be used to upscale the results from this paper.*

### Reply:

We would like to thank the reviewer for their valuable suggestion. We agree that this section is more appropriate after the drone study, and we have revised the manuscript accordingly.

The primary goal of the PRISMA analysis is to explore whether the last generation hyperspectral imagery can detect spectral features associated with CH<sub>4</sub> emissions, thereby aiding source term estimation with drones in regions where source locations are unknown. However, since this initial exploration does not provide sufficient evidence to establish a direct correlation between the spectral anomalies and CH<sub>4</sub> emissions - given that these anomalies may be influenced by other landscape features - we prefer to refrain from conducting a correlation analysis at this stage. We believe this topic would be better suited for future research with dedicated datasets from multiple sites.

To clarify this point in the manuscript, we propose the changes listed below. In the revision we emphasize the need for further research and highlight how the satellite observations can be used. We believe that these adjustments align well with the new position of the satellite analysis in the manuscript.

### Changes:

#### Abstract

...

~~In this study, we apply this approach to verify and quantify potential methane sources identified through radiance anomalies observed in hyperspectral satellite data.~~

...

Finally, we show that radiance anomalies identified in hyperspectral satellite data can be used to inform targeted drone missions, as these anomalies may serve as indicators of potential methane sources.

...

~~2.1~~ **2.3 Satellite observations for source detection**

...

However, it is important to note that spatial variations in other factors, such as vegetation water content, leaf structure, and soil moisture, can also influence the SR index. Consequently, while the SR index may capture landscape features associated with grazing or animal presence, it does not necessarily correlate directly with CH<sub>4</sub> emissions.

...

### **3.1 3.3 Source detection through satellite observations**

...

~~We observe a lower SR index at the herd locations compared to the surrounding background. These low SR anomalies, which indicate relatively low radiance levels in the CH<sub>4</sub> absorption feature, may suggest higher atmospheric CH<sub>4</sub> concentrations and therefore point to the presence of a CH<sub>4</sub> source. The observed lower SR index precisely at the cattle herd locations illustrates the feasibility of using PRISMA satellite imagery to detect the location of potential CH<sub>4</sub> sources. In addition to CH<sub>4</sub>, bare soil exhibits unique features in the SWIR. We detected anomalies with two herds inside a boma against a bare soil background, and a free-grazing herd against a green vegetation background. Although the limited dataset prevents a robust assessment, these preliminary results reinforce our confidence in the effectiveness of our approach for detecting the location of potential CH<sub>4</sub> sources. Further dedicated studies are necessary to evaluate the generalizability of these findings.~~

...

~~Detecting the location of potential CH<sub>4</sub> sources could represent a first step in mapping regional CH<sub>4</sub> sources. Such mapping can lay the groundwork for applying source term estimation methods, as targeted measurement campaigns can then focus on investigating these identified potential source locations. In our study with ruminant herds, the source locations are already known. However, this approach can be particularly useful for regions like thawing permafrost landscapes, where CH<sub>4</sub> source locations are generally unknown. Additional measurements are necessary to verify the location detection of potential CH<sub>4</sub> sources based on low SR anomalies and to quantify their emission rates. High-resolution observational platforms, such as drones, are needed to obtain the detailed data required to estimate CH<sub>4</sub> sources from livestock herds, such as those at Kapiti.~~

We observed a lower SR index at the herd locations compared to the surrounding background. Specifically, we detected anomalies with the two herds inside a boma against a bare soil background, as well as the free-grazing herd against a green vegetation background. These SR anomalies, which indicate relatively low radiance levels in the CH<sub>4</sub> absorption feature, may suggest higher atmospheric CH<sub>4</sub> concentrations, pointing to the presence of a CH<sub>4</sub> source. However, since the estimated emission rates of the herds are well below the expected detection limits for point sources



from PRISMA of approximately  $500 \text{ kg h}^{-1}$  (Guanter et al., 2021), caution should be taken in interpreting this result. Importantly, this lower SR level may also arise from features associated with grazing or the herd's presence, such as changes in vegetation cover or soil disturbance. Although our limited dataset prevents to evaluate whether the observed anomalies are related to emissions or landscape features, these preliminary results call for more in-depth investigation on the proposed approach for detecting the location of potential  $\text{CH}_4$  sources using last-generation high resolution hyperspectral satellite missions. Further dedicated studies are necessary to evaluate the generalizability of these findings.

The use of hyperspectral satellite data for detecting potential  $\text{CH}_4$  source locations marks an initial step towards mapping regional  $\text{CH}_4$  emissions. By identifying areas of interest, we can strategically target drone campaigns to investigate these potential source locations. In our study focused on ruminant herds, the source locations were already known. However, detecting potential source locations from satellite imagery can be particularly useful in regions such as thawing permafrost landscapes, where  $\text{CH}_4$  source locations are typically unknown.

...

#### 4 Conclusions

...

~~By analyzing radiance anomalies in hyperspectral PRISMA satellite data, we detected three cattle herds present at Kapiti Research Station in Kenya. Using the ratio between radiance in the 2300 nm and 2100 nm bands, we showed that it is feasible to locate herds within a boma and free-grazing herds. In particular, this approach allows us to identify the location of potential  $\text{CH}_4$  sources emitting approximately  $1,000 \text{ g h}^{-1}$  or more. While the detection of the location of potential  $\text{CH}_4$  sources, such as cattle herds, is feasible using current satellite data, higher-resolution observations are necessary to accurately estimate their  $\text{CH}_4$  emission rates. ...~~

In an exploratory analysis, we detected anomalies in the SWIR spectrum from hyperspectral satellite data associated with two cattle herds on bare soil and one herd on grassland. Further research is needed to ascertain whether these anomalies correlate directly with increased  $\text{CH}_4$  concentrations or if they resulted from other features related to the herd's presence or grazing activities. Ultimately, the ability to identify potential emission plumes - even from relatively low-emission sources like the cattle herds in our study, which were emitting approximately  $1,000 \text{ g h}^{-1}$  - represents a promising initial step toward mapping regional  $\text{CH}_4$  emissions in landscapes where the precise source locations are unknown.



P16, L432-436: “Specifically, the wind direction determines the plume’s orientation, while wind speed and diffusivity influence the plume’s shape, and the emission rate determines how elevated the plume’s concentration level is above the background. We consider these four parameters - wind direction  $\phi$ , wind speed  $V$ , diffusivity  $D$ , and emission rate  $q$  – as unknowns to be inferred.” This could be mentioned already in the methods.

**Reply:**

We thank the reviewer for their feedback. We have moved this information to the Methods & Materials section.

**Changes:**

**2.1.2 Bayesian inference method**

...

Each of the meteorological parameters in Eq. (1) influences different aspects of the emission plume. Specifically, the wind direction determines the plume’s orientation, while wind speed and diffusivity influence the plume’s shape, and the emission rate determines how elevated the plume’s concentration level is above the background. The instantaneous wind fluctuates in amplitude and direction due to turbulent forces, which are influenced by the effective diffusivity  $D$ . The effective diffusivity is the sum of turbulent diffusivity and the typically much smaller molecular diffusivity.

COMMENT # 1.19

P16, L443: “we frequently observe different patterns”: Could you specify, which patterns?

**Reply:**

By ‘patterns’, we were referring to the distinct trends that we observed in the results and which are discussed in this section. We propose the following clarification.

**Changes:**

**3.1.1 Bayesian inference method**

...

We frequently observe ~~different patterns~~ distinct trends when using drone-based methods to estimate  $\text{CH}_4$  emission rates of sheep and goat herds [...] to denote their relatively lower emission rates in our study. These observed distinct trends will be discussed in greater detail in this section.

COMMENT # 1.20

P16, L444: “Except for camels, the herds consist of approximately 100 to 200 animals”: How many animals did the camel herds consist of?

**Reply:**

We have revised the sentence and included the number of camels.

**Changes:**

**3.1.1 Bayesian inference method**

...

~~Except for camels, the herds consist of approximately 100 to 200 animals~~ Except for the camel herd, which consisted of 42 animals, the other herds comprised approximately 100 to 200 animals each .

COMMENT # 1.21

P18, L484-486: “Observation cases (b) and (c) present an interesting topic for future study: Is it more valuable to have an anemometer on the drone to capture local and temporal wind variations, or to place an anemometer close to the source at a fixed location and use MOST to obtain diffusivity observations?”: Could you speculate or form a hypothesis which could be better?

**Reply:**

We thank the reviewer for their suggestion and fully agree that the experimental design related to the anemometer placement does not have an obviously optimal solution. We have revised the manuscript to clarify the suggested topic for future study and have incorporated a hypothesis.

**Changes:**

**3.1.1 Bayesian inference method**

...

~~Is it more valuable to have an anemometer on the drone to capture local and temporal wind variations, or to place an anemometer close to the source at a fixed location and use MOST to obtain diffusivity observations?~~ Is it more valuable to equip the drone with an anemometer to capture spatial wind variations, albeit potentially affected by the drone’s downwash and motion, or to place a fixed anemometer near the source, which may provide more accurate observations and enable a more reliable application of MOST to derive diffusivity data? We hypothesize that a fixed anemometer may be the superior option within the current framework, which employs an advection-diffusion model based on mean wind conditions. In contrast, a mobile

sensor may prove superior in frameworks that account for spatial variations in the wind field.

COMMENT # 1.22

*P18, L492: Here, you compare the values to IPCC Tier 1 values. You didn't introduce them in the materials section, but you could do it briefly when also introducing the Tier 2 method.*

**Reply:**

We thank the reviewer for their valuable suggestion. As recommended, we have revised the beginning of the IPCC Tier 2 mission values section to introduce the IPCC Tier 1 values as well. We propose the following changes.

**Changes:**

## 2.2 IPCC Tier 2 emission values

...

~~In addition to drone-based methods, we estimate CH<sub>4</sub> emissions from enteric fermentation of ruminant herds at Kapiti using the IPCC Tier 2 approach Paustian et al. (2006). This method is based on the typical daily metabolic energy balance of the animals,~~

...

In addition to drone-based methods, we estimated CH<sub>4</sub> emissions from enteric fermentation of ruminant herds using the IPCC Tier 1 and Tier 2 approaches (Paustian et al., 2006). The Tier 1 method uses generalized default values for emission factors  $EF$  [kg head<sup>-1</sup> d<sup>-1</sup>], often specific to regions or continents. In contrast, the Tier 2 method incorporates more detailed, herd-specific or animal-specific data, making Tier 2 values generally more reliable than Tier 1 estimates. This method is based on the typical daily metabolic energy balance of the animals, ...

COMMENT # 1.23

*P23, L617-619: Were the differences between before and after grazing statistically insignificant?*

**Reply:**

We thank the reviewer for their insightful question. We have performed a one-tailed Student's t-test to determine if the differences in emissions before and after grazing were statistically significant. We have included the results in the revised version of the manuscript as follows.

**Changes:**

### 3.2 Method comparison

...

Feeding is known to increase CH<sub>4</sub> production in ruminants (Amon et al., 2001; Hegarty, 2013). ~~and we assess whether this effect is observable in our results for the other herds as well. The~~ . Using a one-sided Student's t-test (Student, 1908) on the relative difference in emissions pre- and post-grazing across all animal groups, we found a statistically significant effect of grazing for the Bayesian inference results ~~show the hypothesized effect of grazing in~~ (p-value = 0.009), but not for the mass balance results (p-value = 0.194). We observe that seven out of ten ~~cases, with considerably higher emission rate estimates~~ Bayesian inference cases have markedly higher mean emission rates in the afternoon compared to the morning. ~~In the cases of~~ For pregnant does and weaner kids, ~~although there is an overall increase in emissions before and while the emission estimates increase~~ after grazing, the considerable overlap in the uncertainty ranges makes the ~~effect less clear. For the final effect ambiguous.~~ In the case of lactating ewes, the difference in emissions before and after grazing is slightly negative ~~; however, the uncertainty ranges overlap, making the effect inconclusive but ambiguous.~~ In contrast, the mass balance results do not consistently demonstrate an increase in CH<sub>4</sub> emissions post-grazing, with ~~a substantial increase~~ substantial increases observed in only ~~three two~~ out of ten cases ~~-heifers 06/03, slick herd, ; the slick herd~~ and lactating ewes. We consider this to be a promising indicator for the greater reliability and accuracy of our Bayesian inference results compared to our mass balance results.

#### COMMENT # 1.24

P23, L623-625: "With the exception of the cows and lactating ewes drone flights, the Bayesian inference estimates pre-grazing are lower than the IPCC Tier 2 value, and the post-grazing estimates are higher than the IPCC Tier 2 value, or the uncertainty ranges of the different methods overlap.": Are the IPCC Tier 2 values some kind of averages, i.e. they can be used to calculate annual emissions? If so, shouldn't you then compare some kind of average of the before and after grazing emission rates with the IPCC values?

#### Reply:

The IPCC values indeed provide estimated daily emission rates that are based on the typical metabolic energy balance of the animals. As the method accounts for daily energy intake and use, it does not allow for estimates of diurnal variations in emissions. To compare the IPCC values to the drone-based estimates, we converted these daily values to hourly rates. We propose to clarify this in the caption of Fig. 5.

At the start of the Method comparison section, we compare the drone-based re-

sults to the IPCC Tier 2 values. As suggested by the reviewer, we propose to include here the average (pre- and post-grazing) results compared to the IPCC Tier 2 results.

To improve clarity and brevity of the manuscript, we suggest removing the text quoted in the comment from the manuscript.

## Changes:

### Caption of Figure 5

~~..., and IPCC emission values.~~ ..., and IPCC emission factors converted from daily to hourly emission rates.

...

### 3.2 Method comparison

...

In Sec. 3.1.1 and 3.1.2, we ~~observed~~ found that the Bayesian inference results for all herds are of the same order of magnitude as the IPCC Tier 1 values. ~~Conversely,~~ while ~~In contrast,~~ our mass balance results for strong sources (cattle herds) fall within the same order of magnitude as the IPCC Tier 1 values, while those for weak sources (sheep and goat herds) are substantially higher than the IPCC Tier 1 values ~~for weak sources (sheep and goat herds)~~ in several drone flights. This finding is further supported by comparisons to the herd-specific IPCC Tier 2 values ~~We observe that both the,~~ which are generally regarded as more reliable, though they should not be considered definitive. We compare the average (pre- and post-grazing) emission rate estimates to the IPCC Tier 2 values. We found a relative difference of 16% for the Bayesian inference results and a relative difference of 10% for the mass balance results across flights with strong sources of  $Q \approx 700 \text{ g h}^{-1}$  to  $Q \approx 1,500 \text{ g h}^{-1}$  (Table B1). ~~However, a majority of the mass balance results are substantially higher than the IPCC Tier 2 values for~~ For the flights with weaker sources of  $Q \approx 70 \text{ g h}^{-1}$  to  $Q \approx 140 \text{ g h}^{-1}$  (Table B1). ~~this inconsistency indicates , we observed a relative difference of 40% for the Bayesian inference results and a relative difference of 683% for the mass balance results. This disparity suggests~~ that the source term estimation threshold of the Bayesian inference method is considerably lower than that of the mass balance method applied in our study ~~, suggesting that Bayesian inference can be used to estimate~~ Consequently, Bayesian inference may be more effective in estimating weaker sources where the mass balance method ~~might fail to reliably estimate sources~~ may provide unreliable estimates .

...

~~With the exception of the cows and lactating ewes drone flights, the Bayesian inference estimates pre-grazing are lower than the IPCC Tier 2 value, and the post-grazing estimates are higher than the IPCC Tier 2 value, or the uncertainty ranges of the different methods overlap.~~

COMMENT # 1.25

*P23, L633: “In comparison to the Bayesian inference method, the mass balance approach is more straightforward to implement.”: Why is that? Do you mean, for example, that the math behind it is simpler/requires less assumptions?*

**Reply:**

We thank the reviewer for their question. We consider the mass balance method to be easier to use due to its lower model complexity, which requires less coding and reduces the need for parameter tuning. We propose to clarify this point in the manuscript as follows.

**Changes:**

**3.2 Method comparison**

...

In comparison to the Bayesian inference method, the mass balance approach is more straightforward to **implement** use due to its smaller model complexity, which requires less coding and reduces the need for parameter tuning.

COMMENT # 1.26

*P26, L716-718: “Future applications of the Bayesian framework for source term estimation could extend to diverse natural and anthropogenic sources, such as CH<sub>4</sub> emissions from wetlands, hotspots in thawing permafrost, landfills, and wastewater disposal sites.”: This paper focused on “point-like” sources but wetlands and landfills are “sparser” and have emissions from a larger area. How well does the method introduced here suit such cases? Are there major issues that need to be addressed before Bayesian interference can be used over such areas?*

**Reply:**

We thank the reviewer for raising this important point. We believe that the Bayesian inference method represents a promising general approach with the potential to map emissions in diverse landscapes. However, as the reviewer pointed out, extending the framework from point-like sources to more sparse or homogeneous sources will require some adjustments to the framework. We propose to revise the manuscript as follows.

**Changes:**

## 4.2 Future applications

...

Future applications of the Bayesian framework for source term estimation could extend to diverse natural and anthropogenic sources, ~~such as~~ including CH<sub>4</sub> emissions from wetlands, ~~hotspots in~~ thawing permafrost, landfills, and wastewater disposal sites. Our ultimate aim is to leverage Bayesian inference to comprehensively map these areas, thereby improving our understanding of spatial variations in emissions across diverse landscapes. While the framework is readily applicable to point-like sources, such as thermokarst hotspots, future research should focus on adapting this framework to infer emissions from landscapes characterized by multiple sparse sources that may vary in size and produce overlapping emission plumes. This adaptation may require not only precise estimation of emission rates but also accurate localization of these sources.

COMMENT # 1.27

### *Technical corrections*

*P19, L525: Should it be “Figure 5” and not 2?*

#### **Reply:**

We thank the reviewer for drawing our attention to this point. Both figures demonstrate the intermittency of the emission plume. We have corrected the manuscript accordingly. Please note that the numbering of the figures has changed due to the reorganization of the manuscript.

#### **Changes:**

### **3.1.2 Mass balance method**

...

Figures 2 and 4 demonstrates the intermittency of the observed instantaneous plume:

...

COMMENT # 1.28

*P19, L536: “negative mission rate” -> “negative emission rate”*

#### **Reply:**

---

Fixed.

---

COMMENT # 1.29

*P23, L625 and L628: "IPPC" -> "IPCC"*

**Reply:**

---

Fixed.

---



## REFERENCES

- Amon, B., Amon, T., Boxberger, J., and Alt, C.: Emissions of NH<sub>3</sub>, N<sub>2</sub>O and CH<sub>4</sub> from dairy cows housed in a farmyard manure tying stall (housing, manure storage, manure spreading), *Nutrient Cycling in Agroecosystems*, 60, 103–113, <https://doi.org/10.1023/A:1012649028772>, 2001.
- Andersen, T., Vinkovic, K., De Vries, M., Kers, B., Necki, J., Swolkien, J., Roiger, A., Peters, W., and Chen, H.: Quantifying methane emissions from coal mining ventilation shafts using an unmanned aerial vehicle (UAV)-based active AirCore system, *Atmospheric Environment: X*, 12, 100 135, <https://doi.org/10.1016/j.aeaoa.2021.100135>, 2021.
- Busetto, L. and Ranghetti, L.: prismaread: A tool for facilitating access and analysis of PRISMA L1/L2 hyperspectral imagery v1. 0.0, URL: <https://lbusett.github.io/prismaread/><https://doi.org/10.5281/zenodo.4019081>, 2020.
- Francis, A., Li, S., Griffiths, C., and Sienz, J.: Gas source localization and mapping with mobile robots: A review, *Journal of Field Robotics*, <https://doi.org/10.1002/rob.22109>, 2022.
- Giardino, C., Bresciani, M., Braga, F., Fabbretto, A., Ghirardi, N., Pepe, M., Giannetto, M., Colombo, R., Cogliati, S., Ghebrehiwot, S., Laanen, M., Peters, S., Schroeder, T., Concha, J. A., and Brando, V. E.: First evaluation of prisma level 1 data for water applications, *Sensors (Switzerland)*, 20, 1–16, <https://doi.org/10.3390/s20164553>, 2020.
- Guanter, L., Irakulis-Loitxate, I., Gorroño, J., Sánchez-García, E., Cusworth, D. H., Varon, D. J., Cogliati, S., and Colombo, R.: Mapping methane point emissions with the PRISMA spaceborne imaging spectrometer, 265, 112 671, <https://doi.org/10.1016/j.rse.2021.112671>, 2021.
- Gålfalk, M., Nilsson Pålédal, S., and Bastviken, D.: Sensitive Drone Mapping of Methane Emissions without the Need for Supplementary Ground-Based Measurements, *ACS Earth and Space Chemistry*, 5, 2668–2676, <https://doi.org/10.1021/acsearthspacechem.1c00106>, 2021.
- Hegarty, R.: Applicability of short-term emission measurements for on-farm quantification of enteric methane, *Animal*, 7, 401–408, <https://doi.org/10.1017/S1751731113000839>, 2013.
- Hutchinson, M., Oh, H., and Chen, W.-H.: A review of source term estimation methods for atmospheric dispersion events using static or mobile sensors, *Information Fusion*, <https://doi.org/10.1016/j.inffus.2016.11.010>, 2017.

- Loizzo, R., Guarini, R., Longo, F., Scopa, T., Formaro, R., Facchinetti, C., and Varacalli, G.: PRISMA: The Italian hyperspectral mission, in: IGARSS 2018-2018 IEEE international geoscience and remote sensing symposium, pp. 175–178, 2018.
- Paustian, K., Ravindranath, N., and van Amstel, A.: 2006 IPCC Guidelines for National Greenhouse Gas Inventories, no. Part 2 in Volume 4: Agriculture, Forestry and Other Land Use, [s.n.], 2006.
- Sanz-Alonso, D.: Inverse problems and data assimilation, vol. 107 of *London Mathematical Society student texts* ;, Cambridge University Press, Cambridge, 1st ed. edn., ISBN 1-009-41433-X, 2023.
- Shah, A., Allen, G., Pitt, J. R., Ricketts, H., Williams, P. I., Helmore, J., Finlayson, A., Robinson, R., Kabbabe, K., Hollingsworth, P., Rees-White, T. C., Beaven, R., Scheutz, C., and Bourn, M.: A Near-Field Gaussian Plume Inversion Flux Quantification Method, Applied to Unmanned Aerial Vehicle Sampling, *Atmosphere*, 10, 396, <https://doi.org/10.3390/atmos10070396>, 2019.
- Shah, A., Pitt, J. R., Ricketts, H., Leen, J. B., Williams, P. I., Kabbabe, K., Gallagher, M. W., and Allen, G.: Testing the near-field Gaussian plume inversion flux quantification technique using unmanned aerial vehicle sampling, *Atmospheric Measurement Techniques*, 13, 1467–1484, <https://doi.org/10.5194/amt-13-1467-2020>, 2020.
- Student: The probable error of a mean, *Biometrika*, pp. 1–25, 1908.
- Sutton, O.: The theoretical distribution of airborne pollution from factory chimneys, *Quarterly Journal of the Royal Meteorological Society*, <https://doi.org/https://doi.org/10.1002/qj.49707331715>, 1947.

# Inferring methane emissions from African livestock by fusing drone, tower, and satellite data

Alouette van Hove<sup>1</sup>, Kristoffer Aalstad<sup>1</sup>, Vibeke Lind<sup>2</sup>, Claudia Arndt<sup>3</sup>, Vincent Odongo<sup>3</sup>, Rodolfo Ceriani<sup>4,5</sup>, Francesco Fava<sup>5</sup>, John Hulth<sup>1</sup>, and Norbert Pirk<sup>1</sup>

<sup>1</sup>Department of Geosciences, University of Oslo (UiO), Oslo, Norway

<sup>2</sup>Norwegian Institute of Bioeconomy Research (NIBIO), Tjøtta, Norway

<sup>3</sup>Mazingira Centre, International Livestock Research Institute (ILRI), Nairobi, Kenya

<sup>4</sup>Department of Agricultural and Environmental Sciences, University of Milan (UNIMI), Milan, Italy

<sup>5</sup>Department of Environmental Science and Policy, University of Milan (UNIMI), Milan, Italy

**Correspondence:** Alouette van Hove (a.van.hove@geo.uio.no)

## Abstract.

Considerable uncertainties and unknowns remain in the regional mapping of methane sources, especially in the extensive agricultural areas of Africa. To address this issue, we developed an observing system that estimates methane emission rates by assimilating drone and flux tower observations into an atmospheric dispersion model. ~~In this study, we apply this approach to verify and quantify potential methane sources identified through radiance anomalies observed in hyperspectral satellite data. We compare different methods to~~ We use our novel Bayesian inference approach to estimate emissions from various ruminant livestock species in ~~sub-Saharan Africa~~ Kenya, including diverse herds of cattle, goats, and sheep, as well as camels, for which methane emission estimates are particularly sparse. Our ~~estimates, derived from Bayesian inference,~~ Bayesian estimates align with Tier 2 emission values of the Intergovernmental Panel on Climate Change. We moreover observe the hypothesized increase in methane emissions following feeding. Our findings suggest that the Bayesian inference method is more robust under non-stationary wind conditions compared to a conventional mass balance approach using drone observations. Furthermore, the Bayesian inference method performs better in quantifying emissions from weaker sources, estimating methane emission rates as low as ~~100 g h<sup>-1</sup>~~, 100 g h<sup>-1</sup>. We find a  $\pm 50\%$  uncertainty in emission rate estimates for these weaker sources, such as sheep and goat herds, which reduces to  $\pm 12\%$  for stronger sources, like cattle herds emitting ~~1,000–1,500 g h<sup>-1</sup>~~, 1,000–1,500 g h<sup>-1</sup>. Finally, we show that radiance anomalies identified in hyperspectral satellite data can be used to inform targeted drone missions, as these anomalies may serve as indicators of potential methane sources. These promising results demonstrate the ~~potential and~~ efficacy of the Bayesian inference method for source term estimation. Future applications of drone-based Bayesian inference could extend to estimating methane emissions in Africa and other regions from various sources with complex spatiotemporal emission patterns, such as wetlands, landfills, and wastewater disposal sites. The Bayesian observing system could thereby contribute to the ~~validation and improvement of climate models and emission inventories~~ improvement of emission inventories and verification of other emission estimation methods.

## 1 Introduction

While methane ( $\text{CH}_4$ ) emissions from so-called super-emitters ( $>100 \text{ kg h}^{-1}$ ) can be quantified using satellite data, the current spatial resolution and spectral resolution, as well as the precision of satellite observations, are not sufficient to effectively quantify weaker sources, such as livestock herds (Sherwin et al., 2023). To address this limitation and complement the regional mapping of  $\text{CH}_4$  sources of various strengths, we developed an observing system that uses a Bayesian inference approach to assimilate drone and flux tower observations in an atmospheric dispersion model to estimate  $\text{CH}_4$  emission rates. We assess the efficacy of the Bayesian inference method in quantifying  $\text{CH}_4$  emissions from nine different ruminant herds in sub-Saharan Africa—an important, yet poorly understood, source in the global  $\text{CH}_4$  emission inventory. By comparing our results to those obtained using a mass balance method with drone observations and to emission values of the Intergovernmental Panel on Climate Change (IPCC) (Gavrilova et al., 2019), we demonstrate the effectiveness and robustness of our approach.

Global mean atmospheric methane ( $\text{CH}_4$ ) concentrations surpassed 1.90 ppm in 2022, concentrations reached 1.93 ppm in 2024, marking a 16%–16% increase since 1985 (Lan et al., 2024). Livestock production is a major contributor to global anthropogenic  $\text{CH}_4$  emissions, accounting for approximately one-third of the total emissions (Saunois et al., 2020). Within this sector, enteric fermentation in ruminants—such as cattle, sheep, goats, and camels—is the predominant source, generating approximately 80%–80% of these emissions, while the remaining 20%–remainder originates from manure (Amon et al., 2001). During the digestive process,  $\text{CH}_4$  is produced by rumen fermentation, with about 90–95%–90–95% released through burping and 5–10%–5–10% as intestinal gas (Broucek, 2014). Because  $\text{CH}_4$  has a high global warming potential and a relatively short atmospheric lifetime, reducing its  $\text{CH}_4$  emissions can have quick benefits in mitigating climate change (Szopa et al., 2021). Therefore, accurate measurements and understanding of  $\text{CH}_4$  emissions from ruminants are important for developing effective mitigation strategies and evaluating their efficacy.

The IPCC provides internationally recognized Intergovernmental Panel on Climate Change (IPCC) provides standardized methodologies for estimating  $\text{CH}_4$  emissions from ruminants (Gavrilova et al., 2019). Tier 1 methods use generalized default values for emission factors, which are often continent or region specific. In contrast, that are often region specific, while Tier 2 values incorporate more detailed herd-specific or animal-specific data. These data account data, accounting for local variations in livestock breeds, manure management practices, feed quality, management and environmental conditions. Recent studies from sub-Saharan Africa have demonstrated demonstrate substantial differences between emission estimates from these two tiers (Goopy et al., 2018; Ndung'u et al., 2019; Gurmu et al., 2024), highlighting the need for precise, locally relevant data. However, there is a scarcity of studies focusing on  $\text{CH}_4$  emission rates from ruminants in this region. Many studies use, with many relying on metabolic energy balance estimates based on factors such as animal weight, feed, and activity level, with few studies actually measuring and only a few studies using direct  $\text{CH}_4$  concentrations (as done by e.g., Korir et al., 2022a; Goopy et al., 2020; ). We aim to contribute to help bridge this knowledge gap.

measurements (e.g., Korir et al., 2022a; Goopy et al., 2020; Mwangi et al., 2023; Wolz et al., 2022). Specifically, research on  $\text{CH}_4$  emissions from camels is sparse. Although a few studies have estimated emissions using direct  $\text{CH}_4$  measurements from smaller camelids such as alpacas and llamas (e.g., Pinares-Patiño et al., 2003; Nielsen et al., 2014), research on larger

camelids, like dromedaries and Bactrian camels, remains limited. This lack of data is likely due to ~~the respiration chambers used size limitations of respiration chambers~~ for measuring gas exchange ~~being too small to fit these larger animals~~. Nonetheless, Dittmann et al. (2014) conducted respiration chamber measurements with Bactrian camels. ~~Our study represents one of the first efforts to estimate CH<sub>4</sub> emissions from camels, specifically dromedaries, thereby contributing to the development of knowledge in a relatively unstudied field.~~

Gas exchange methods such as respiration chambers and headboxes are typically used to quantify CH<sub>4</sub> emissions from individual animals. For estimating emissions from ruminant herds or entire farm facilities, several indirect techniques have been applied. Tracer-ratio experiments (Vechi et al., 2022; Daube et al., 2019; Arndt et al., 2018) involve releasing a ~~known quantity of a~~ tracer gas and comparing its dispersion to that of CH<sub>4</sub>. The mass balance approach (Vinković et al., 2022; Arndt et al., 2018; Wratt et al., 2001) calculates emissions based on the difference between incoming and outgoing CH<sub>4</sub> flux estimates ~~in within~~ a defined volume. ~~Other~~ Some studies (Wolz et al., 2022; Bai et al., 2021; Arndt et al., 2018) use open-path Fourier transform infrared or laser spectrometry to obtain horizontal path-integrated CH<sub>4</sub> concentrations upwind and downwind from the source. ~~These concentration data, which~~ are combined with a Lagrangian particle dispersion model to estimate emission rates. Inverse modeling techniques (Andersen et al., 2021) infer emission rates by fitting an atmospheric dispersion model to measured atmospheric data, ~~possibly incorporating prior knowledge.~~

~~On much.~~ On larger spatial scales, typically spanning multiple kilometers, satellite observations are ~~frequently~~ used to detect and quantify CH<sub>4</sub> emissions from super-emitters, such as ~~leaks from~~ oil and gas ~~production and large leaks and~~ landfills (e.g., Pandey et al., 2019; Dogniaux et al., 2024). However, the smaller emission rates of livestock herds are ~~much smaller, and therefore~~ more challenging to ~~identify as potential CH<sub>4</sub> sources from satellite data. To accurately map the emission plumes from these weaker sources, detect using satellite data, necessitating~~ measurement platforms with a higher spatial resolution ~~are needed.~~

~~The advent of drone technology as a versatile platform for carrying measurement equipment has enabled.~~ Drone technology provides a solution, enabling high-resolution spatiotemporal observations of atmospheric gases and thermodynamic variables (Villa et al., 2016; Burgués and Marco, 2020). ~~This innovation allows for data collection over a larger spatial region than fixed flux towers or monitoring stations and offers higher spatial resolution compared to satellite-based measurements. Moreover, drones facilitate measurements in locations that are otherwise inaccessible to crewed aircrafts due to safety reasons, such as areas close to the CH<sub>4</sub> source and near the ground.~~

~~In our study, we utilize~~ Our study uses drones to sample ~~and map~~ CH<sub>4</sub> emission plumes from ~~African ruminant herds nine different ruminant herds in Kenya~~, leveraging this data ~~to estimate their CH<sub>4</sub> production. Notably, this research is, as far as we know, a pioneering effort to employ drones for CH<sub>4</sub> emission quantification from ruminants in sub-Saharan Africa. We apply two distinct methods: a traditional mass balance method and~~ for emission estimation.

Our study employs an innovative Bayesian inference approach ~~that uses,~~ using a sequential Monte Carlo method to invert an atmospheric ~~diffusion model. To complement this analysis, we assess the capability of hyperspectral satellite data to pinpoint the location of CH<sub>4</sub> sources, specifically ruminant herds, by identifying spectral anomalies at the landscape level.~~

90 While Bayesian inference has previously been applied with drone observations in homogeneous environments with artificial  
 gas sources (Hutchinson et al., 2019, 2020; Park et al., 2021), to the best of our knowledge, this research marks the first application  
 of the method for quantifying ruminant emissions in real-world conditions using drone observations. The Bayesian framework addresses  
 uncertainties in atmospheric observations, potentially enhancing dispersion model. This method combines observed data with  
 prior information to enhance emission estimation. A key advantage of Bayesian inference is its ability to integrate noisy  
 95 observations from multiple platforms, including drones and flux towers. The framework's probabilistic approach systematically  
 accounts for observation uncertainties, potentially improving the precision and reliability of our emission estimates. Furthermore,  
 it allows for the integration of observations from multiple platforms, including drones and flux towers. We explore which sensor  
 observations—specifically CH<sub>4</sub> concentration measurements and wind measurements, either from the drone or the flux tower—  
 are most effective for applying the Bayesian inference approach.

100 We aim to achieve the following objectives: (1) To investigate whether spectral indices related to CH<sub>4</sub> emissions from We  
 assess the efficacy and robustness of this novel method by comparing our results with those obtained from a conventional mass  
 balance method and IPCC emission values. To complement this analysis, we assess the capability of hyperspectral satellite  
 data can aid in detecting the locations to pinpoint the location of CH<sub>4</sub> sources, specifically ruminant herds. (2, by identifying  
 spectral anomalies at the landscape level. Our objectives are as follows: (1) To evaluate the efficacy of the Bayesian inference  
 105 method utilizing drone-based observations for estimating CH<sub>4</sub> emission rates. (32) To determine emission rates for free-grazing  
 cattle, sheep, goats, and camels in a sub-Saharan African country using drone-based observations. (43) To compare the results  
 obtained from the novel Bayesian inference method with estimates from a more traditional mass balance method and IPCC  
 Tier 2 values, to evaluate emission IPCC values, evaluating different methods for estimating CH<sub>4</sub> emissions from ruminants in  
 sub-Saharan Africa and to contribute to the improvement of and contributing to improving national greenhouse gas inventories.

110 (4) To investigate whether spectral indices related to CH<sub>4</sub> emissions from hyperspectral satellite data can assist in detecting  
 locations of CH<sub>4</sub> sources, specifically ruminant herds.

## 2 Materials and methods

This study was conducted at the Kapiti Research Station in Kenya, approximately ~~60 km~~ 60 km south-east from Nairobi. The  
 station is managed by the International Livestock Research Institute (ILRI). Covering over 13,000 hectares, the station houses  
 115 various ruminants, including cattle, sheep, goats, and camels, with a primary focus on studying livestock productivity and a  
 secondary focus on the conservation of migratory wildlife species. Kapiti is located in Kenya's semi-arid savanna, characterized  
 by a diversity of savanna grasses, shrubs, and scattered Acacia trees. Livestock management at Kapiti follows typical pastoral  
 systems, where herders allow the animals to graze freely during the day and keep them in enclosures, known in Kenya as bomas,  
 during the night. Apart from livestock, there were no other known CH<sub>4</sub> sources of considerable magnitude close to the study  
 120 site. The net savanna soil background flux was estimated to be nearly zero. Measurements recorded by the eddy-covariance  
 tower at the study site indicated values of  $0.4 \pm 2.6 \text{ mg m}^{-2} \text{ h}^{-1}$  during the drone flights and  $0.7 \pm 3.7 \text{ mg m}^{-2} \text{ h}^{-1}$  throughout  
 the period of the measurement campaign. This finding is further supported by chamber measurements conducted at the study

site over the entire year 2017, which reported a net flux of  $0.1 \pm 0.7 \mu\text{g m}^{-2} \text{h}^{-1}$  (Leitner et al., 2024). Consequently, we considered the savanna soil background flux to be negligible.

This section outlines the different methodologies used in this study four methods that were used to detect and estimate  $\text{CH}_4$  sources. We apply four approaches: (1)  $\text{CH}_4$  source location detection through hyperspectral satellite observations, and three methods for source term estimation: (2)  $\text{CH}_4$  source term estimation source term estimation through drone observations using an innovative particle-based Bayesian inference method, (3)  $\text{CH}_4$  (2) source term estimation through drone observations using a traditional mass balance approach, and (4) (3) calculation of IPCC Tier 2 emission values.

## 2.1 Satellite observations for source detection

In an exploratory effort, we investigate the potential for detecting livestock herds as, and (4) detection of potential  $\text{CH}_4$  sources using satellite hyperspectral imagery. On 6 March 2024, the PRecurso IperSpettrale della Missione Applicativa (PRISMA) satellite (Loizzo et al., 2023) was commissioned to capture a hyperspectral image of Kapiti, while three cattle herds were present at different sites. The PRISMA satellite has two hyperspectral sensors that cover a spectral range from 400 nm to 2500 nm. Methane exhibits strong absorption features in the Shortwave Infrared (SWIR) region between 2150 nm and 2500 nm, with particularly strong absorption around 2300 nm (Moorhead, 1932; Brown et al., 2003; Roger et al., 2024a). Consequently, the Simple Ratio (SR) index of the wavelengths at 2300 nm and 2100 nm (SR2300/2100) is commonly used to detect spatial variations in source locations through hyperspectral satellite observations at the landscape level. Although the latter is not a direct source term estimation method, we evaluated whether radiance anomalies in satellite data could effectively detect potential  $\text{CH}_4$  absorption (Xiao et al., 2023). A lower SR indicates lower relative radiance at 2300 nm and thus greater absorption, suggesting higher atmospheric  $\text{CH}_4$  concentrations. However, it is important to note that spatial variations in other factors, such as vegetation water content, leaf structure, and soil moisture, can also influence the SR index.

We process the hyperspectral data of the PRISMA satellite in the infrared region to detect spatial variations in the  $\text{CH}_4$  absorption feature. Starting from Level-1 top-of-atmosphere radiance narrowbands (Giardino et al., 2020), infrared information is integrated into single data cubes using the PRISMAread package in the R environment (Busetto and Ranghetti, 2020). This produces hyperspectral data cubes consisting of 173 bands, spanning infrared wavelengths from 920 nm to 2505 nm. Finally, we calculate the SR index for each data cube using the SWIR wavelengths at 2300 nm and 2100 nm sources to guide targeted drone missions for further investigation and quantification.

## 2.1 Drone-based source term estimation

This section provides details of the drone field campaign, conducted between 29 February and 7 March 2024 at Kapiti. It outlines both the Bayesian inference method and the mass balance approach used to estimate  $\text{CH}_4$  emission rates from drone observations.

We use-used a drone equipped with a gas sensor to obtain  $\text{CH}_4$  concentration observations of the emission plumes of nine different ruminant herds: cattle (cows, heifers, steers, and slick herd), sheep (lactating ewes), goats (dry does, pregnant does, weaner kids), and camels. The cows, heifers, and steers are-were Boran cattle, while the slick herd is-consisted of a crossbreed

between Holstein-Friesian and Boran heifers. The sheep flock ~~consists of~~included Red Masaai and Dorper, and the goat herds ~~emprise~~comprised Small East African and Galla varieties. The camels ~~are~~were dromedaries. The lactating ewes had lambs, and the pregnant does had kids with them. However, since the rumen fermentation systems of milk-fed lambs and kids are not yet fully developed (Baldwin et al., 2004), we ~~assume~~assumed their CH<sub>4</sub> emissions to be negligible and ~~treat~~treated these  
160 herds as if the lambs and kids were not present. The herd sizes are included in Table B1.

During the drone flights, the respective herds were confined within a boma at coordinates  $-1.61365^{\circ}\text{N}$ ,  $37.13234^{\circ}\text{E}$ . The animals exhibited no signs of distress and appeared at ease throughout the drone operations. Figure 1 shows the heifers inside the boma~~during a drone flight that coincided with the satellite overpass~~, as well as a herd of camels observing a passing drone.

Typically, four flights were conducted for each ruminant herd. In the morning, before grazing, two flights were performed:  
165 one flight for each emission estimation method,~~namely the Bayesian inference approach and a mass balance approach~~. The Bayesian inference flight focused on monitoring the downwind emission plume at various distances and altitudes from the source. In contrast, the mass balance flight, following Gålfalk et al. (2021), involved flying a virtual box around the source, capturing the differences in concentrations upwind and downwind from the source. The same set of flights was repeated in the afternoon after the animals had grazed. Feed intake is known to increase enteric CH<sub>4</sub> emissions in ruminants, with peak  
170 emissions occurring shortly after feeding (Amon et al., 2001; Hegarty, 2013). Since the animals had no access to feed during the night, lower emissions are expected in the morning compared to the afternoon, following grazing. We ~~investigate whether there is~~investigated whether there was a noticeable increase in CH<sub>4</sub> emissions between the morning and afternoon flights, using consistent observations of such increases as indicators of the method's reliability and accuracy.

During control drone flights, conducted without animals present in the boma or the immediate surroundings, no increase in  
175 CH<sub>4</sub> levels was observed throughout the field campaign. ~~Based on this observation, we assume~~ Consequently, we assumed that CH<sub>4</sub> production from manure ~~is negligible in our study and attribute~~was negligible, attributing the elevated CH<sub>4</sub> concentrations ~~above the background level~~ solely to enteric fermentation. This is supported by Leitner et al. (2024), which found that boma manure contributes only 2.2% to total CH<sub>4</sub> emissions at Kapiti.

### 2.1.1 Observing system

180 Our observing system ~~consists~~consisted of a DJI M300 RTK drone equipped with an AERIS MIRA Strato LDS CH<sub>4</sub> gas sensor, as well as a stationary flux tower with an eddy covariance system (Burba, 2013). The tower ~~is~~was located at coordinates  $-1.61419^{\circ}\text{N}$ ,  $37.13313^{\circ}\text{E}$ , approximately ~~100 m~~100 m south-south-east from the center of the boma, as shown in Fig. 2.

The drone's position was recorded using Real-Time Kinematic (RTK) positioning. A Digital Elevation Model (DEM) of the area was obtained using DJI L1 Lidar, processed in DJI Terra. The altitude data ~~of~~from the RTK system ~~was~~were corrected  
185 using the DEM at the drone's home location. Additionally, the DEM was used to determine the drone's flight height above the ground surface.

The AERIS MIRA Strato LDS gas analyzer detects CH<sub>4</sub> using mid-infrared laser spectroscopy, which measures the absorption of infrared radiation by CH<sub>4</sub> molecules. The reported mixing ratio ~~X~~X [ppm; parts per million per volume] at the point measurement is the fraction of CH<sub>4</sub> molecules per million molecules of air. The sensor has a sensitivity of ~~1 ppb~~



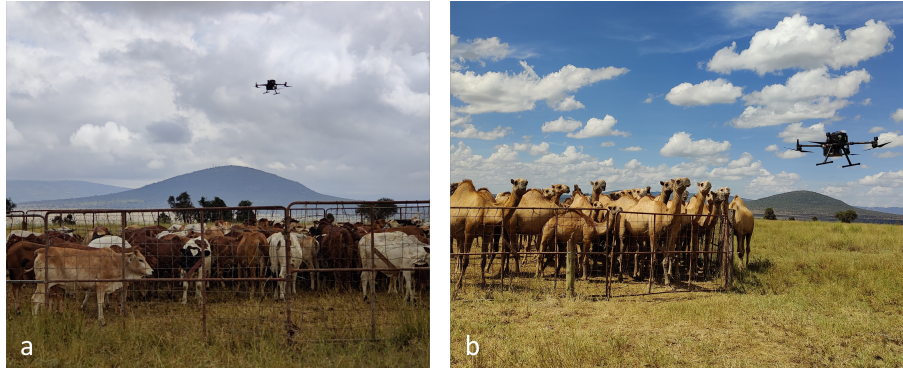

**Figure 1.** (a) A drone flight capturing methane concentration observations of a heifer herd coinciding with the satellite overpass on 6 March 2024. (b) Camels inside the boma during a drone flight on 4 March 2024. Of all animals, the camels were the most curious about the drone.

190 0.001 ppm and a sampling rate of 1 Hz. ~~The~~ 1 Hz. The sensor was factory calibrated and has an expected drift of 0.01 to 0.05 ppm since calibration (from communication with the manufacturer). The mixing ratio  $X$  ~~is~~ was converted to mass concentration  $c$  [ $\text{g m}^{-3}$ ] using the ideal gas law, ~~where~~ with the ambient air temperature and pressure ~~are~~ obtained from the flux tower.

Wind data were collected using two sensor platforms: a fixed flux tower and the drone. Wind data ~~was~~ were captured by the 3D sonic anemometer mounted on the tower at a height of 5 m ~~5 m~~ above the ground. The wind speed and wind direction data were resampled from ~~10 Hz to 1 Hz~~ 10 Hz to 1 Hz to match the timestamps of the  $\text{CH}_4$  sensor. The data from the eddy-covariance system ~~was~~ were processed at half-hour intervals using EddyPro (Li-Cor) to determine the Obukhov length  $L$  [m] and friction velocity  $u_*$  [ $\text{m s}^{-1}$ ]. Using Monin Obukhov Similarity Theory (MOST; see Stull, 1989), we ~~estimate~~ estimated the vertical profile of the mean wind speed  $V(z)$  [ $\text{m s}^{-1}$ ] and mean eddy diffusivity  $K(z)$  [ $\text{m}^2 \text{s}^{-1}$ ], where  $z$  is the distance above the ground. Appendix A includes details on the application of MOST.

The drone quantifies wind speed using its onboard sensors to measure resistance during stable hover or flight. This data, combined with the drone's GPS and inertial measurement unit (IMU), allows for estimations of wind speed and direction by analyzing the accelerations and attitude adjustments needed to counteract the wind's force (Abichandani et al., 2020). Wind data from the drone were obtained from the flight logs using the Flight Reader software.

205 Given concerns that the additional bulk and weight of the  $\text{CH}_4$  sensor might affect readings, we performed a correction for wind speed. During the field campaign, the drone hovered for a total of 90 minutes a couple of meters downwind from the sonic anemometer under various wind speeds and orientations relative to the wind direction. Wind speed data from the drone were corrected through linear regression against the sonic anemometer data (Fig. S1 in Supplementary Material). The wind direction is reported by the drone in eight compass directions. The wind direction data did not qualitatively match well with the sonic anemometer data and were therefore not used in our study (Fig. S2 in Supplementary Material).

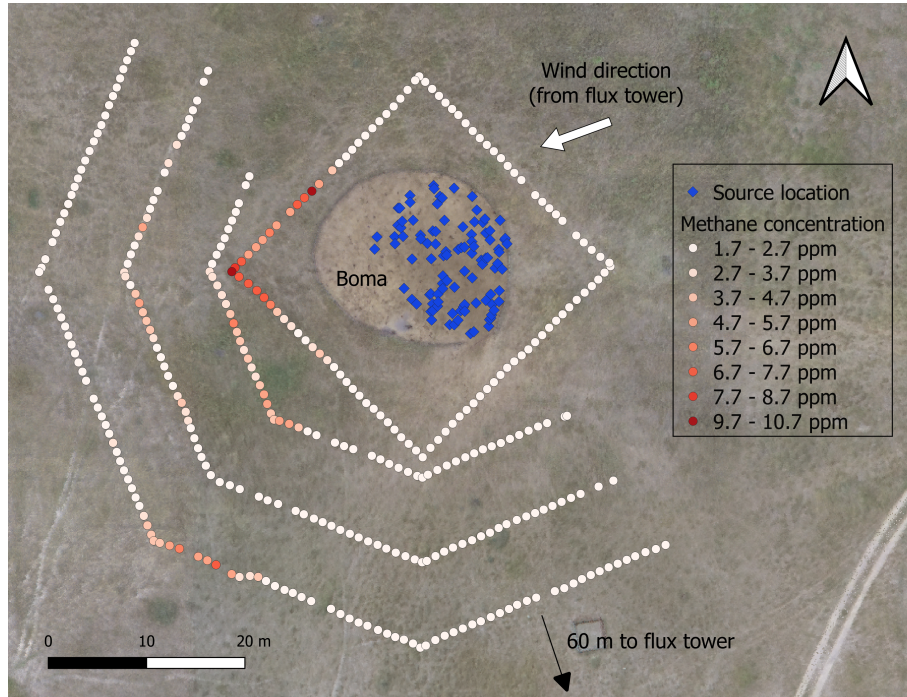

**Figure 2.** Top-down view of the drone flight paths capturing  $\text{CH}_4$  concentration observations in the afternoon of 6 March 2024. Shown are  $\text{CH}_4$  concentration measurements obtained at a height of ~~2.7 m~~ 2.7 m during the mass balance flight around the boma, and at heights of ~~3.5 m~~ 3.5 m, ~~3.0 m~~ 3.0 m, ~~2.5 m~~ 2.5 m during the half-octagon flight for the Bayesian inference method. The blue markers indicate the source location in the atmospheric dispersion model, representing the heifer herd. The wind direction arrow shows the mean wind direction observed by the flux tower.

### 2.1.2 Bayesian inference method

The first drone-based method for quantifying  $\text{CH}_4$  emission rates utilizes an inverse modeling approach, ~~which assimilates~~ Model inversion involves estimating unknown input parameters of a theoretical model by utilizing observed data related to output parameters. We assimilated atmospheric measurements into an atmospheric transport model to infer emission rates.

215 Two principal approaches are commonly employed in model inversion: (1) Several studies (Andersen et al., 2021; Shah et al., 2019, 2020) minimize a cost function to find the best fit between a Gaussian plume model (Sutton, 1947) and observed  $\text{CH}_4$  concentrations, using a frequentist framework. (2) In the field of robotics, various studies employ ~~a Bayesian inference approach to model inversion in order~~ Bayesian inference for model inversion to estimate source emission rates and source locations, among other unknown variables, at local scales (Hutchinson et al., 2017; Francis et al., 2022). ~~Unlike optimization,~~

220 ~~the~~ The Bayesian approach is particularly well suited to solving ill-posed inverse problems involving the assimilation of noisy observations that are ubiquitous in geophysics (Sanz-Alonso, 2023). Beyond robotics, Bayesian frameworks are also utilized

in estimating carbon emissions on regional or global scales from satellite observations (Cusworth et al., 2021; Western et al., 2021) and international ground-based atmospheric observation networks (Evangelizou et al., 2018; Thompson et al., 2022).

We ~~adopt~~adopted a Bayesian approach, providing a probabilistic interpretation of the model parameters and including uncertainty quantification of the parameter estimates. Previous research has demonstrated the efficacy of Bayesian inference with synthetic drone observations for source localization and estimation (Loisy and Eloy, 2022; van Hove et al., 2024b). However, its applications in real-world environments at a local scale remain relatively limited. Hutchinson et al. (2019) and Park et al. (2021) successfully deployed Bayesian inference methods in outdoor experiments with flat, homogeneous terrain and time-invariant controlled-release sources, while Hutchinson et al. (2020) explored emissions from a car crash and oil rig at a test site. In real-world conditions, Pirk et al. (2022) assimilated drone observations within a Bayesian framework to infer turbulent fluxes of sensible and latent heat of a wetland and a palsa mire in Norway.

We ~~use~~used the advection-diffusion model formulated by Vergassola et al. (2007) to simulate CH<sub>4</sub> transport under turbulent atmospheric conditions. This model has been shown by Hutchinson et al. (2019) to more accurately represent small-scale plume behavior compared to the Gaussian plume model. The mean stationary concentration  $c$  [g m<sup>-3</sup>] at measurement location  $\mathbf{x} = [x, y, z]$  is given by

$$c(\mathbf{x}, \mathbf{x}_s) = \frac{Q/\alpha}{4\pi D|\mathbf{x} - \mathbf{x}_s|} \exp\left(\frac{-(x - x_s)V \sin(\phi)}{2D}\right) \exp\left(\frac{-(y - y_s)V \cos(\phi)}{2D}\right) \exp\left(\frac{-|\mathbf{x} - \mathbf{x}_s|}{\lambda}\right) + c_0, \quad (1)$$

where  $\mathbf{x}_s = [x_s, y_s, z_s]$  represents the source location,  $Q$  [g h<sup>-1</sup>]  $Q$  [g h<sup>-1</sup>] denotes the CH<sub>4</sub> emission rate,  $\alpha = 3600$  s h<sup>-1</sup> is the time conversion factor from hours to seconds,  $V$  [m s<sup>-1</sup>]  $V$  [m s<sup>-1</sup>] represents the mean wind speed,  $\phi$  [°]  $\phi$  [°] is the mean wind direction,  $D$  [m<sup>2</sup> s<sup>-1</sup>]  $D$  [m<sup>2</sup> s<sup>-1</sup>] denotes the effective diffusivity,  $\lambda$  [m]  $\lambda$  [m] is a characteristic length scale, and  $c_0$  [g m<sup>-3</sup>]  $c_0$  [g m<sup>-3</sup>] is the mean stationary background concentration. We make a distinction between the emission rate of the entire herd, denoted by  $Q$  [g h<sup>-1</sup>]  $Q$  [g h<sup>-1</sup>], and the emission rate per individual animal, denoted by  $q$  [g head<sup>-1</sup> h<sup>-1</sup>]  $q$  [g head<sup>-1</sup> h<sup>-1</sup>].

Each of the meteorological parameters in Eq. (1) influences different aspects of the emission plume. Specifically, the wind direction determines the plume's orientation, while wind speed and diffusivity influence the plume's shape, and the emission rate determines how elevated the plume's concentration level is above the background. The instantaneous wind fluctuates in amplitude and direction due to turbulent forces, which are influenced by the effective diffusivity  $D$ , which-. The effective diffusivity is the sum of turbulent diffusivity and the typically much smaller molecular diffusivity. Unlike the Gaussian plume model, which uses dispersion parameters  $\sigma_y$  and  $\sigma_z$ , typically determined by the stability classification schemes of Pasquill (1961), effective diffusivity  $D$  is directly incorporated in the model. Consequently, by making the assumption  $D \approx K$ , observational estimates of  $D$  can be obtained via MOST, as detailed in Appendix A.

The length scale  $\lambda$  in Eq. (1) is defined as

$$\lambda = \sqrt{\frac{D\tau}{1 + \frac{V^2\tau}{4D}}}, \quad (2)$$

where  $D$  denotes the effective diffusivity,  $V$  is the mean wind speed, and  $\tau$  is the finite lifetime of CH<sub>4</sub> in the atmosphere, approximately 9.1 years (Prather et al., 2012).

To conserve  $\text{CH}_4$  mass in Eq. (1), the ground ~~is~~was modeled as a perfect reflector of the plume, as is typically done in Gaussian plume modeling (Hanna et al., 1982). This ~~is~~was achieved by including a mirror image source below the ground surface:  $\mathbf{x}_{s, \text{mirror}} = -\mathbf{x}_s$ . Consequently, the total concentration field ~~becomes~~is expressed as the sum of the original and mirrored sources:  $c(\mathbf{x}, \mathbf{x}_s) \leftarrow c(\mathbf{x}, \mathbf{x}_s) + c(\mathbf{x}, \mathbf{x}_{s, \text{mirror}})$ .

In our study, emission rate  $Q$ , mean wind speed  $V$ , mean wind direction  $\phi$ , and effective diffusivity  $D$  in Eq. (1) are treated as unknown parameters to be inferred through model inversion. The parameters that are assumed to be known include the source location  $\mathbf{x}_s$ , drone locations  $\mathbf{x}$ , and background concentration  $c_0$ , which have been determined as follows. On the small spatial scale of our study, approximating the herd of animals as a single point source would be an over-simplification. Instead, we ~~model~~modeled the herd as a set of  $m$  sources, resulting in a total concentration field that is the sum of the individual concentrations from these sources:  $c(\mathbf{x}, \mathbf{x}_s) \leftarrow \sum_i^m c(\mathbf{x}, \mathbf{x}_{s,i})$ . This source superposition is commonly used in Gaussian plume modeling (e.g. Calder (1977)). Using aerial photographs taken during the drone flights, we randomly ~~select~~selected  $m = 100$  source locations within the outline of the herd, which together are responsible for emission rate  $Q$ . For example, the 100 blue markers within the boma shown in Fig. 2 represent the source location of a heifer herd. After inferring emission rate  $Q$ , we ~~normalize~~normalized it by the actual number of animals in the herd to obtain the emission rate per individual animal  $q$ . The source height  $z_s$  ~~is~~was estimated by averaging the mouth height of 10 animals from each herd, based on direct measurements. The ~~mean background concentration peaks of the concentration histogram~~ for each drone flight ~~is empirically determined~~ by calculating were below 1.8 ppm, and the mean background concentration  $c_0$  was determined as the median of the  $\text{CH}_4$  concentration observations that fall below the threshold of 1.8 ppm. observations below this threshold. Although this value is lower than the global average of 1.93 ppm, measurements in Norway before and after the field campaign were close to the global average, and data inspection by the manufacturer revealed no sensor abnormalities, suggesting that this low value was natural. Addressing any remaining concerns, we note that both drone methods rely on concentration elevations above the background level, ensuring that any potential systematic bias does not affect the final estimates.

The drone flew nine legs in a half-octagon pattern downwind of the herd at three different distances: approximately ~~40 m, 30 m, and 20 m~~ 40 m, 30 m, and 20 m from the center of the boma. The corresponding heights for the outer legs were approximately ~~3.5 m, 5.5 m, and 9.0 m~~ 3.5 m, 5.5 m, and 9.0 m; for the middle legs, ~~3.0 m, 4.5 m, and 7.0 m~~ 3.0 m, 4.5 m, and 7.0 m; and for the inner legs, ~~2.5 m, 3.5 m, and 5.0 m~~ 2.5 m, 3.5 m, and 5.0 m above ground level. To minimize the effects of rotor downwash (visualized with colored smoke in Crazzolara et al. (2019)) and downwind disturbances to the plume (visualized with colored smoke in Hutchinson et al. (2019)), the flights were performed from the outer to the inner legs, starting at the lowermost altitude and ascending to higher altitudes. Figure 2 offers a top-down view of the boma and illustrates the measured  $\text{CH}_4$  concentrations along the lowest three legs of the half-octagon flight plan during the drone flight with a herd of heifers ~~on the same day as the satellite overpass.~~

~~In our study, we~~ We explore the use of three different observing systems for model inversion:

- (a)  **$\text{CH}_4$  concentration data:** We ~~assimilate~~assimilated only instantaneous drone-based  $\text{CH}_4$  concentration data as observations for  $c$ .

- (b) **CH<sub>4</sub> concentration data with drone-derived wind speed:** We ~~assimilate~~ assimilated the same concentration data (observation case (a)) along with mean wind speed observations  $V_{\text{obs}}$  derived from drone data. The average wind speed ~~is~~ was calculated over the estimated plume depth of ~~8 m~~ 8 m. Specifically, wind speed data from the drone flight ~~is averaged~~ over 1 m were averaged over 1 m vertical intervals up to ~~8 m~~ 8 m, and the overall average ~~is then~~ was obtained over these interval-specific averages.
- (c) **CH<sub>4</sub> concentration data with flux tower data:** We ~~assimilate~~ assimilated CH<sub>4</sub> concentration data (observation case (a)) in combination with observations for mean wind speed  $V_{\text{obs}}$ , mean wind direction  $\phi_{\text{obs}}$ , and effective diffusivity  $D_{\text{obs}}$  derived from the flux tower data. ~~Hereby, we make the approximation~~ In this case, we approximate that  $D \approx K$ , and assume that the vertical and horizontal diffusivity are equal, as is done in Eq. (1). We ~~obtain~~ obtained mean wind speed and diffusivity values by averaging their respective profiles - Eq. (A1) and Eq. (A3) - over the estimated vertical plume extent of ~~8 m~~ 8 m.

We employ a probabilistic approach to model inversion, applying Bayesian inference recursively to mini-batches of observational data to make the problem more computationally tractable (Chopin, 2002). At each new iteration step  $n + 1$ , the dynamic prior probability distributions of the unknown parameters  $p(\theta|\mathbf{d}_{0:n})$  are updated to the posterior probability distributions  $p(\theta|\mathbf{d}_{0:n+1})$  given a new mini-batch of observations  $\mathbf{d}_{n+1}$  via Bayes' rule

$$p(\theta|\mathbf{d}_{0:n+1}) = \frac{p(\mathbf{d}_{n+1}|\theta)p(\theta|\mathbf{d}_{0:n})}{p(\mathbf{d}_{n+1}|\mathbf{d}_{0:n})}, \quad (3)$$

where the conditional model evidence (or marginal likelihood) acts as a normalizing constant

$$p(\mathbf{d}_{n+1}|\mathbf{d}_{0:n}) = \int p(\mathbf{d}_{n+1}|\theta)p(\theta|\mathbf{d}_{0:n})d\theta. \quad (4)$$

At each new iteration  $n + 1$ , the dynamic prior distributions  $p(\theta|\mathbf{d}_{0:n})$  are simply the corresponding dynamic posteriors from the previous iteration  $n$ . The use of such sequential Bayesian updating makes the inference problem more computationally tractable and is a key property of the sequential Monte Carlo methods that we employ in practice (Chopin and Papaspiliopoulos, 2020). Note the slight abuse of notation where  $\mathbf{d}_0$  is implicitly empty, and thus  $p(\theta|\mathbf{d}_0)$  - rather than the usual  $p(\theta)$  - denotes the initial prior at  $n = 0$  for notational convenience.

The likelihood term  $p(\mathbf{d}_{n+1}|\theta)$  in Eq. (3) links the observations to the forward model, effectively serving as a measure of discrepancy between the observed data and the model predictions. The observational model relating observations  $\mathbf{d}$  to the forward model prediction is given by

$$\mathbf{d} = \mathcal{F}(\theta) + \epsilon, \quad (5)$$

where  $\epsilon$  represents the discrepancy (or residual) term, explicitly capturing the various sources of error in the measured data (and implicitly also errors in the model). For the CH<sub>4</sub> concentration observations  $c_{\text{obs}}$ , the forward model  $\mathcal{F}$  is defined by Eq. (1). In the case of the wind and diffusivity observations,  $\mathcal{F}$  is a more direct noisy mapping; for example, the observed mean wind speed  $V_{\text{obs}}$  is modeled as  $V_{\text{obs}} = V + \epsilon_V$ .



As Rao (2005) identifies, discrepancies in atmospheric dispersion modeling can arise due to: (a) noise in the sensor mea-  
 320 surements, (b) errors in the model input data, (c) the fact that atmospheric dispersion models are imperfect, and (d) inherent  
 randomness in unresolved turbulent dispersion processes. Given the limited knowledge of these errors, the Gaussian distribution  
 is the most conservative choice for the likelihood function according to the maximum entropy principle (Jaynes, 2003). Thus,  
 we define the likelihood function as a Gaussian of the form  $p(\mathbf{d}_{n+1}|\boldsymbol{\theta}) = \mathcal{N}(\mathbf{d}_{n+1}|\mathcal{F}(\boldsymbol{\theta}), \mathbf{R})$  where the mean vector  $\mathcal{F}(\boldsymbol{\theta})$  con-  
 tains the model predictions and  $\mathbf{R}$  is a diagonal observation error covariance matrix with observation error variances  $\sigma^2$  along  
 325 the diagonal. These observation error variances correspond to the respective observation error standard deviations empirically  
 estimated as  ~~$\sigma_c = 1 \text{ ppm}$ ,  $\sigma_V = 0.30 \text{ ms}^{-1}$ ,  $\sigma_\phi = 10^\circ$ , and  $\sigma_D = 0.15 \text{ m}^2 \text{ s}^{-1}$~~   $\sigma_c = 1 \text{ ppm}$ ,  $\sigma_V = 0.30 \text{ ms}^{-1}$ ,  $\sigma_\phi = 10^\circ$ , and  
 $\sigma_D = 0.15 \text{ m}^2 \text{ s}^{-1}$  for concentration  $c$ , mean wind speed  $V$ , wind direction  $\phi$ , and effective diffusivity  $D$ , respectively.

We recognize a discrepancy between the timescales of our concentration observations and the statistical assumptions of our  
 dispersion model presented by Eq. (1): while the observations are instantaneous samples of a turbulent boundary layer, our  
 330 model represents a time-averaged plume. This discrepancy or representation error (van Leeuwen, 2015) is expected to be the  
 largest source of uncertainty in our Bayesian inference approach. Additional sources of uncertainty include the assumption  
 of a fixed vertical plume extent, ignoring uncertainties inherent in the (assumed) known variables such as the background  
 concentration, among other factors. To account for these approximations and minimize the impact of potential errors, we  
 incorporate a high level of uncertainty into the likelihood term by inflating the observation error covariance  $\mathbf{R}$  to match the  
 335 aforementioned observation error standard deviations.

The initial prior distributions  $p(\boldsymbol{\theta}|\mathbf{d}_0)$  are chosen to be flat non-informative priors in the form of uniform distributions  
 across defined ranges to match reasonable prior expectations (Banner et al., 2020):  $q \sim \mathcal{U}(0.36, 36.00) \text{ g head}^{-1} \text{ h}^{-1}$ ,  $V \sim$   
 $\mathcal{U}(0, 6) \text{ ms}^{-1}$ ,  ~~$\phi \sim \mathcal{U}(-45, 135)^\circ$~~   $\phi \sim \mathcal{U}(-45, 135)^\circ$ , corresponding to the wind compass half of the prevailing wind direc-  
 tion, and  $D \sim \mathcal{U}(0.3, 3.0) \text{ m}^2 \text{ s}^{-1}$ . We implement the Bayesian inference framework in Python (available from van Hove et al.  
 340 (2024a)) by a Sequential Monte Carlo (SMC) framework (Chopin and Papaspiliopoulos, 2020; Särkkä and Svensson, 2023)  
 that generalizes the classic bootstrap particle filter (Gordon et al., 1993). This method approximates the probability distribu-  
 tions with a set of weighted ensemble members, referred to as particles. In each iteration, the weights of these particles are  
 updated based explicitly on their likelihood, representing their fit to the observed data, and implicitly on the dynamic prior. To  
 address the particle degeneracy problem, where only a few particles retain significant weights, we apply the resample-move al-  
 345 gorithm (Gilks and Berzuini, 2001; Doucet and Johansen, 2009). This algorithm enhances the particle diversity and exploration  
 of the parameter space by combining resampling with subsequent Markov Chain Monte Carlo (MCMC) moves. Additionally,  
 reflective boundaries are used to respect the predefined ranges of the prior uniform distributions. In our algorithm, we use  
 25,000 particles, a mini-batch size of 200 observations, and perform five MCMC steps per iteration step.

Due to the inherently stochastic nature of the SMC algorithm, different realizations can yield varying results. This variability  
 350 arises from randomness in the prior sampling, the generation of proposals in each MCMC step, the selection of the mini-batches  
 of observations, and the determination of the  $m$  source locations representing the herd. As a result, it is common practice to  
 run the SMC algorithm multiple times to (a) assess the variability of its output and (b) obtain more reliable statistical estimates

of the inferred parameters (Chopin and Papaspiliopoulos, 2020; Vergé et al., 2015). Thereby, we perform 22 independent realizations of the SMC algorithm in an outer loop to derive more robust estimates of the CH<sub>4</sub> emission rates.

355 [The methodological challenges encountered during the implementation of the Bayesian inference method are discussed in Section 3.2.](#)

### 2.1.3 Mass balance method

The second drone-based method for quantifying CH<sub>4</sub> emission rates uses a mass balance approach. Based on the divergence theorem, this technique determines the emission rate from a CH<sub>4</sub> source by assessing the net horizontal inflow and outflow of CH<sub>4</sub> within an imaginary box enclosing the source. The mass balance approach, or box model, has been widely utilized with drone observations in various studies. For example, Allen et al. (2019) and Gálfalk et al. (2021) estimated emissions from landfills, while Andersen et al. (2021) determined emissions from coal mining ventilation shafts, and Vinković et al. (2022) investigated emissions from a dairy farm. Additionally, Golston et al. (2018) and Yang et al. (2018) applied the mass balance method with a laser-based CH<sub>4</sub> sensor capturing a column-integrated concentration along a vertical path between the drone and the ground to investigate natural gas leaks. On larger scales, the method has been applied using aircraft observations. For example, Cambaliza et al. (2014) assessed emissions of an urban region including multiple sources such as power plants, landfills, and wastewater treatments, while Arndt et al. (2018) quantified emissions of dairy farms encompassing animal housing and liquid manure storage. On regional or global scales, mass balance analysis is used to estimate emission rates from satellite observations (e.g. Pandey et al. (2019); Borchardt et al. (2021)). However, Varon et al. (2018) notes that this method is susceptible to large errors. This is due to the inability to accurately parameterize turbulence on the small scale of instantaneous plumes, as well as poor characterization of the vertical wind speed profile between the ground surface and satellite.

The drone collects CH<sub>4</sub> point measurements along the vertical planes of an imaginary box encapsulating the source. Data are then interpolated onto a regular grid to calculate the net emission rate  $Q$  [g h<sup>-1</sup>] by integrating the product of CH<sub>4</sub> concentration  $c$  [g m<sup>-3</sup>] and outward perpendicular wind speed across the vertical sampling planes:

$$375 \quad Q = \sum_{\text{planes}} \left[ \sum_i^{k_i} \sum_j^{k_j} c_{i,j} v_{\perp i,j} a_{i,j} \alpha \right], \quad (6)$$

where  $v_{\perp}$  [m s<sup>-1</sup>] denotes the instantaneous wind speed outward perpendicular to the plane,  $a$  [m<sup>2</sup>] is the area of a grid cell,  $\alpha = 3600$  s h<sup>-1</sup> is the time conversion factor from hours to seconds,  $k_i$  is the number of horizontal grid cells of a plane, and  $k_j$  is the number of vertical grid cells of a plane.

The vertical sampling planes must be sufficiently high to capture the full extent of the emissions, so that there are only negligible fluxes through the top horizontal plane of the imaginary box. Our imaginary box around the boma measures approximately 26 m by 26 m with a height of 10 m. To mitigate downwash effects from the rotors, the drone's flight plan was designed from the ground up. The drone first performed a manual flight at around 1.0 m above the ground for the lowest leg, followed by a pre-planned flight mission with ascending legs at approximately 2.0, 2.7, 3.7, 5.2, 7.2, and 9.2 m. The drone flew at 1 m s<sup>-1</sup>, collecting observations approximately every meter. Figure 2 displays the mea-

385 sured CH<sub>4</sub> concentrations at a height of ~~2.7 m~~ 2.7 m during the flight with the heifer herd on the same day as the satellite overpass.

To evaluate Eq. (6), we used the horizontal instantaneous corrected wind speed data from the drone and wind direction observations from the sonic anemometer on the flux tower, which we considered more reliable than the drone's wind direction estimates. Artificial wind speed data points of ~~0 ms<sup>-1</sup>~~ 0 ms<sup>-1</sup> were added at ground level to account for the no-slip lower  
390 boundary condition. The CH<sub>4</sub> concentration and perpendicular wind speeds were interpolated onto north-east (NE), south-east (SE), south-west (SW), and north-west (NW) facing vertical planes. Following the general approach of Gålfalk et al. (2021), we resampled the observations using the following sequence of steps: (a) linear interpolation of the data points onto a regular grid of circa ~~20 cm<sup>2</sup>~~ 20 cm<sup>2</sup>, (b) averaging onto a coarser grid of circa ~~1 m<sup>2</sup>~~ 1 m<sup>2</sup>, and (c) filling any remaining empty grid cells, if any, using nearest-neighbor values.

395 The current sampling time of approximately ~~20 min~~ 20 min is insufficient to capture the mean state of the plume morphology, introducing uncertainty into the emission rate estimate. This primarily stems from temporal variability induced by unresolved atmospheric turbulence affecting wind speed and wind direction ( $\sigma_{v, \text{temp}}$  and  $\sigma_{\phi, \text{temp}}$ ). This is further complicated by potential wake effects from the herd that disturb the mean flow field, influencing wind speed observations in the downwind sampling plane. Additionally, measurement uncertainties in wind speed and wind direction ( $\sigma_{v, \text{meas}}$  and  $\sigma_{\phi, \text{meas}}$ ) further contribute to  
400 the overall uncertainty in the mass balance approach. Moreover, the wind direction's assessment at the flux tower, rather than at the vertical planes, introduces additional uncertainty. The measurement uncertainty of the CH<sub>4</sub> observations is minimal and considered negligible compared to wind-related uncertainties. Similarly, the relative uncertainty of the interpolation process is considered minor and is excluded from the overall uncertainty estimate. Our approach to uncertainty estimation for the mass balance method aligns with the practices outlined in Andersen et al. (2021).

405 We ~~estimate~~ estimated uncertainties due to temporal variation in wind speed and direction ( $\sigma_{v, \text{temp}}$  and  $\sigma_{\phi, \text{temp}}$ ) based on their standard deviation from the mean at the altitude of each leg of the drone flight, following the methodology presented in Cambaliza et al. (2014). Measurement uncertainties for wind speed and wind direction ~~are~~ were estimated at  $\sigma_{v, \text{meas}} = 1.7 \text{ ms}^{-1}$  and  $\sigma_{\phi, \text{meas}} = 20^\circ$ , respectively. The wind speed uncertainty estimate ~~is~~ was derived from the root mean square error between the corrected wind speed readings from the drone and wind speed records from the sonic anemometer during  
410 hovering flights, see Sect. 2.1. The temporal variation and measurement uncertainty ~~are~~ were summed in quadrature:  $\sigma_v = \sqrt{\sigma_{v, \text{temp}}^2 + \sigma_{v, \text{meas}}^2}$  and  $\sigma_\phi = \sqrt{\sigma_{\phi, \text{temp}}^2 + \sigma_{\phi, \text{meas}}^2}$ . Finally, the total uncertainty estimate for the emission rate ~~is~~ was determined through error propagation (Gålfalk et al., 2021; Andersen et al., 2021; Vinković et al., 2022). A Monte Carlo approach with 500 runs ~~is~~ was used for error propagation (Anderson, 1976) to incorporate the various uncertainty sources.

## 2.2 IPCC Tier 2 emission values

415 In addition to drone-based methods, we ~~estimate~~ estimated CH<sub>4</sub> emissions from enteric fermentation of ruminant herds ~~at Kapiti~~ using the IPCC Tier 1 and Tier 2 approaches (Paustian et al., 2006). The Tier 1 method uses generalized default values for emission factors  $EF$  [kg head<sup>-1</sup> d<sup>-1</sup>], often specific to regions or continents. In contrast, the Tier 2 method incorporates more detailed, herd-specific or animal-specific data, making Tier 2 values generally more reliable than Tier 1



estimates. This method is based on the ~~concept of energy balance~~ typical daily metabolic energy balance of the animals, where  
 420 the CH<sub>4</sub> emission factor  $EF$  ~~kg head<sup>-1</sup> d<sup>-1</sup> of ruminants~~ is calculated by

$$EF = \frac{Y_m GE}{E}, \quad (7)$$

where  $Y_m$  denotes the fractional methane conversion factor,  $GE$  ~~[MJ head<sup>-1</sup> d<sup>-1</sup>]~~ [MJ head<sup>-1</sup> d<sup>-1</sup>] is the gross energy intake, and  $E = 55.65 \text{ MJ kg}^{-1}$  is the energy content of CH<sub>4</sub>. The daily gross energy intake per animal  $GE$  is determined from information on feed quality and feed intake, live weight of the animals, weight changes, as well as productivity parameters  
 425 (as specified in Eq. 10.16 in Paustian et al. (2006)). This data can be obtained at herd level, individual animal level, or a combination of both. Methane conversion factor  $Y_m$  represents the fraction of gross energy intake converted to CH<sub>4</sub>. The IPCC provides  $Y_m$  values for different animal categories based on review and synthesis of available scientific literature and data (cattle values in Table 10.12, and sheep and goat values in Table 10.13 of Paustian et al. (2006)). Since specific values are currently unavailable for camels and we do not have the live weight of the camel herd from our drone flights, we use the IPCC  
 430 Tier 1 value for camels in our study.

At Kapiti, all livestock herds graze freely during the day, and we assume that their feed intake is entirely from pasture. The feed quality of the pasture was determined by averaging the nutrient content of 19 samples collected from different locations across Kapiti on 1 March 2024. These samples were analyzed for dry matter content, nitrogen (converted to crude protein), carbon, ash, and fibre-fractions (NDF: Neutral Detergent Fibre; ADF: Acid Detergent Fibre; ADL: Acid Detergent Lignin).  
 435 This data was used to compute feed digestibility, representing the portion of gross energy intake in the feed not excreted in feces. Data on average feed intake ~~is are~~ difficult to obtain from grazing animals ~~, and was and were~~ therefore estimated.

The live weight [kg] and time-average daily live weight change [kg d<sup>-1</sup>] of individual animals were determined from direct measurements taken during the first half of March 2024, and then again at the end of April or May 2024. The average weight and daily weight change across all animals in a herd were used to compute the  $EF$  for the respective animal category. Additional  
 440 data used to estimate gross energy intake for each animal herd includes: proportion of pregnant females (~~84%~~ 84% of pregnant does herd, ~~30%~~ 30% of cow herd, and ~~30%~~ 30% of slick herd); proportion of lactating females (~~87%~~ 87% of lactating ewes flock); with average milk production (~~1.5~~ 1.5 ~~Lewe<sup>-1</sup> d<sup>-1</sup>~~ Lewe<sup>-1</sup> d<sup>-1</sup>); number of offspring; and an estimate for the animal's activity, specifically the daily walking distance on the pasture [km d<sup>-1</sup>]. We convert the resulting emission factor  $EF$  [kg head<sup>-1</sup> d<sup>-1</sup>] into emission rate  $q$  [g head<sup>-1</sup> h<sup>-1</sup>] for each animal category to enable method comparison in our study.  
 445 With the exception of weight and weight changes, all parameters were estimated at the herd level without accounting for associated uncertainties. As we did not perform an explicit uncertainty assessment for the IPCC values, we apply a ~~±20%~~ ±20% uncertainty range for Tier 2 values and a ~~±30% to ±50%~~ ±30% to ±50% uncertainty range for the Tier 1 ~~value for camels values~~, as reported by the IPCC (Paustian et al., 2006).

### 3 Results and discussion

#### 2.1 Satellite observations for source detection

In this section, we evaluate source location detection through satellite observations and assess each of the drone-based emission estimation methods. We then compare the estimated emission rates from the Bayesian inference method with the results obtained using the mass balance method and IPCC Tier 2 values. A comprehensive overview of the estimated emission rates by the different methods is given in Table B1.

#### 2.2 Source detection through satellite observations

(a) Location of the field campaign at the Kapiti Research Station in Kenya. (b) PRISMA true color image of Kapiti from 6 March 2024 08:00 Coordinated Universal Time (UTC) + 3 hours, corresponding to East Africa Time. (c) to (e) The Simple Ratio (SR) radiance index of 2300/2100 nm with 30 m resolution for three distinct sites: (f) five adjacent bomas (shaded red) housing 583 cows at the time of the satellite overpass but empty in this picture, (g) a single boma at the drone field site with 206 heifers, and (h) a free-grazing herd of 148 heifers. (a) and (f) include Google Satellite Imagery (2021). PRISMA product derived from L1 2024-03-06 ©Italian Space Agency (ASI) (2024). All rights reserved.

Figure 6 shows a true color image of part of Kapiti, captured by the PRISMA satellite on an exploratory effort, we investigated the potential for detecting livestock herds as CH<sub>4</sub> sources using satellite hyperspectral imagery. On 6 March 2024. Despite the partly cloudy conditions, the irregular cloud cover did not occlude the satellite observations of all three cattle herds within our study area. Maps (c) to (e) show the SR index for a region of 5 by 5 pixels with a spatial resolution of 30 m, across three different sites with (f) five adjacent bomas housing 583 cows, (g) the boma at the drone field site with 206 heifers, and (h) a free-grazing herd of 148 heifers, respectively.

We observe a lower SR index at the herd locations compared to the surrounding background. These low SR anomalies, which indicate relatively low radiance levels in the CH<sub>4</sub> absorption feature, may suggest 2024, the PRecursores IperSpettrale della Missione Applicativa (PRISMA) satellite (Loizzo et al., 2018) was commissioned to capture a hyperspectral image of Kapiti specifically for this research, while three cattle herds were present at different locations. The PRISMA satellite has two hyperspectral sensors that measure solar radiation reflected by the Earth over 240 spectral bands, ranging from 400 nm to 2500 nm. Its spatial coverage is 30 × 30 km<sup>2</sup>, with a resolution of 30 m. Methane exhibits strong absorption features in the Shortwave Infrared (SWIR) region between 2150 nm and 2500 nm, with particularly strong absorption around 2300 nm (Moorhead, 1932; . Consequently, the Simple Ratio (SR) index of the wavelengths at 2300 nm and 2100 nm (SR<sub>2300/2100</sub>) is commonly used to detect spatial variations in CH<sub>4</sub> absorption (Xiao et al., 2020; Scafutto et al., 2021; Roger et al., 2024b; Pei et al., 2023). A lower SR indicates lower relative radiance at 2300 nm and thus greater absorption, suggesting higher atmospheric CH<sub>4</sub> concentrations and therefore point to the presence of a . However, it is important to note that spatial variations in other factors, such as vegetation water content, leaf structure, and soil moisture, can also influence the SR index. Consequently, while the SR index may capture landscape features associated with grazing or animal presence, it does not necessarily correlate directly

with CH<sub>4</sub> source. The observed lower SR index precisely at the cattle herd locations illustrates the feasibility of using PRISMA satellite imagery to detect the location of potential emissions.

We processed the hyperspectral data of the PRISMA satellite in the infrared region to detect spatial variations in the CH<sub>4</sub> sources. In addition to CH<sub>4</sub>, bare soil exhibits unique features in the SWIR. We detected anomalies with two herds inside a boma against a bare soil background, and a free-grazing herd against a green vegetation background. Although the limited dataset prevents a robust assessment, these preliminary results reinforce our confidence in the effectiveness of our approach for detecting the location of potential CH<sub>4</sub> sources. Further dedicated studies are necessary to evaluate the generalizability of these findings. Starting from Level-1 top-of-atmosphere radiance narrowbands (Giardino et al., 2020), we integrated the infrared information into single data cubes - composite images representing the same pixel across adjacent spectral bands - using the PRISMAread package in the R environment (Busetto and Ranghetti, 2020). This produced hyperspectral data cubes consisting of 173 spectral bands, spanning infrared wavelengths from 920 nm to 2505 nm. Finally, we calculated the SR index for each data cube using the SWIR wavelengths at 2300 nm and 2100 nm.

Super-emitters are characterized by high concentration plumes with large spatial extents, often covering multiple pixels. In contrast, a low SR anomaly of a single pixel can be observed at the location of the cattle herds, as shown in Fig. 6. The absence of a discernible emission plume complicates the estimation of emission rates directly from the satellite data. While emission rates of super-emitters can be quantified from satellite images (Jacob et al., 2022), the current spatial resolution, spectral resolution and precision of satellite observations are insufficient for accurately estimating the emission rates of smaller sources like livestock herds. The quantification threshold of point sources has been found to be 200 kg h<sup>-1</sup> for GHGSat and 1,400—4,000 kg h<sup>-1</sup> for Sentinel-2, Landsat-8, PRISMA, and WorldView-3 in controlled release experiments under favorable conditions (Sherwin et al., 2023). In contrast, a herd of 200 cows emits considerably less, roughly 1—4 kg h<sup>-1</sup> (Broucek, 2014).

Detecting the location

### 3 Results and discussion

In this section, we compare the estimated emission rates derived from the novel Bayesian inference method with those obtained using a conventional mass balance method and IPCC Tier 2 values. A comprehensive overview of the estimated emission rates by the different methods is given in Table B1. Additionally, we evaluate the detection of potential CH<sub>4</sub> sources could represent a first step in mapping regional CH<sub>4</sub> sources. Such mapping can lay the groundwork for applying source term estimation methods, as targeted measurement campaigns can then focus on investigating these identified potential source locations. In our study with ruminant herds, the source locations are already known. However, this approach can be particularly useful for regions like thawing permafrost landscapes, where CH<sub>4</sub> source locations are generally unknown. Additional measurements are necessary to verify the location detection of potential CH<sub>4</sub> sources based on low SR anomalies and to quantify their emission rates. High-resolution observational platforms, such as drones, are needed to obtain the detailed data required to estimate CH<sub>4</sub> sources from livestock herds, such as those at Kapiti. source locations through hyperspectral satellite observations.

### 3.1 Source term estimation through drone observations

#### 3.1.1 Bayesian inference method

In the atmospheric dispersion model given by Eq. (1), each of the meteorological parameters influences different aspects of the emission plume. Specifically, the wind direction determines the plume's orientation, while wind speed and diffusivity influence the plume's shape, and the emission rate determines how elevated the plume's concentration level is above the background. We consider these four parameters – wind direction  $\phi$ , wind speed  $V$ , diffusivity  $D$ , and emission rate  $q$  – as unknowns to be inferred. We compare Bayesian inference results across three observation cases: (a) using only concentration data, (b) combining concentration data with drone-derived wind speed, and (c) incorporating concentration data with mean wind direction, mean wind speed, and diffusivity obtained from MOST.

Figure 3 presents the Bayesian inference results for the drone flight conducted with the heifer herd on the afternoon of 6 March 2024, on the same day as the satellite overpass. Results for all drone flights are included in Fig. S4 to S24 of the Supplementary Material, and are reported in Table B1. In this section, we analyze the inference results, discussing the overall findings across all drone flights, and examine whether the results presented in Fig. 3 align with these overall findings.

In our study, we frequently observe different patterns across three observation cases: (a) using only concentration data, (b) combining concentration data with drone-derived wind speed, and (c) incorporating concentration data with mean wind direction, mean wind speed, and diffusivity obtained from MOST. We frequently observe distinct trends when using drone-based methods to estimate  $\text{CH}_4$  emission rates of sheep and goat herds at Kapiti compared to cattle herds. Except for camels, the herds consist of the camel herd, which consisted of 42 animals, the other herds comprised approximately 100 to 200 animals each (see Table B1). Due to the markedly lower emission rate per individual animal  $q$  for sheep and goats, these herds have a lower overall emission rate  $Q$ . Consequently, we refer to the sheep and goat herds as ‘weak(er) sources’ to denote their relatively lower emission rates in our study. These observed distinct trends will be discussed in greater detail in this section.

In most of the drone flights, the inferred mean wind direction aligns with the fixed source location and areas of elevated concentration. Overall, the inferred wind direction is both precise and consistent across all three observation cases for cattle drone flights, occasionally overriding the observed wind direction. In Fig. 3, the mean wind direction estimates across the three observation cases coincide, and the inferred direction of  $81^\circ$  corresponds to the angle between the source location and the observation locations with elevation concentration shown in Fig. 2. Specifically, the update in wind direction in observation case (a) indicates that our framework can often infer the wind direction solely from the shape of the concentration plume and the known source location. The posterior mean wind direction becomes more uncertain when dealing with highly variable wind directions without direct observation (observation case (a)), such as during the morning flight with camels (Fig. S14) and the morning flight with pregnant does (Fig. S21).

For weak sources, the Bayesian inference algorithm can misinterpret concentration observations as being upwind of a strong emission source rather than downwind from a weak one if no direct wind direction observation is provided. To address this equifinality issue, we used an informed prior bounded by the half wind-rose:  $\mathcal{U}(-45, 135)^\circ$ . During the first two days of field work, we used a narrower V-shaped flight path instead of the usual half-octagon. Consequently, for the drone flights on these

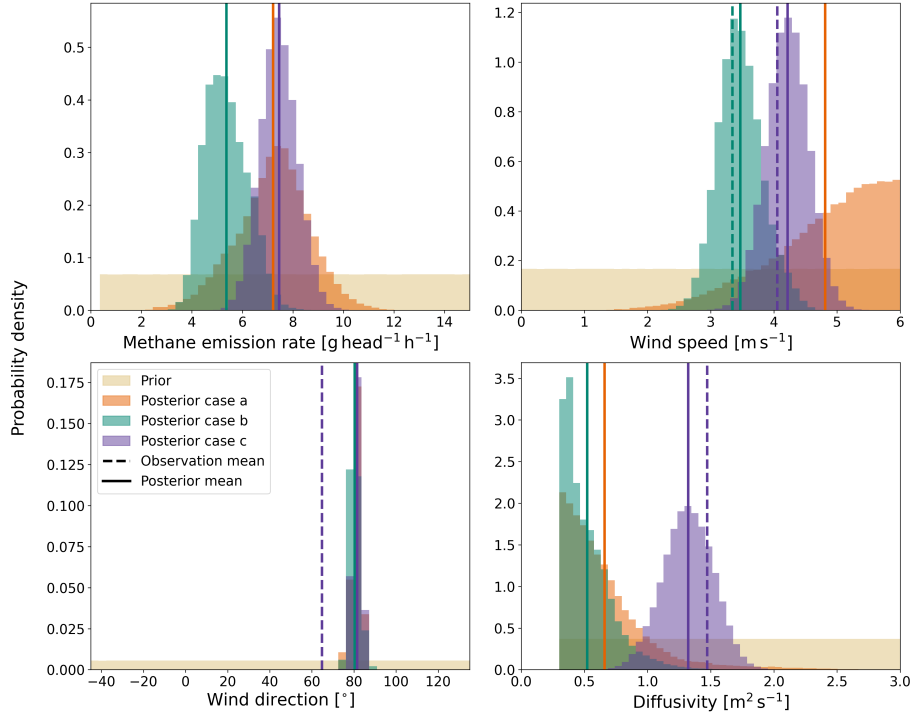

**Figure 3.** Bayesian inference results in the form of posterior distributions obtained using sequential Monte Carlo for the drone flight in the afternoon of 6 March 2024 with 208 heifers. Estimates for three different observation cases: (a) using concentration observations, (b) using concentration observations and mean wind speed data from the drone, (c) using concentration observations and mean wind speed, mean wind direction and diffusivity data derived from MOST.

days, marked with a bullet (•) in Table B1, we adjusted the prior to  $\mathcal{U}(30, 135)^\circ$ . When dealing with weak sources, an informed prior for wind direction was needed in our study to refine the emission rate distribution for observation cases without direct  
 550 wind direction observations. Even with an informed prior, the posterior distribution of the wind direction can remain relatively uninformed for weak sources, such as weaner kids (Fig. S23 and S24). We note that concentration observations obtained in all locations around the source, such as those from the mass balance flight, can help mitigate this ambiguity.

Wind speed and diffusivity influence the shape of the emission plume. Higher wind speeds elongate the plume, while increased diffusivity broadens it. In observation cases (b) and (c), where direct wind speed observations are available, the  
 555 posteriors generally align with these observed values. Typically, the wind speed derived from MOST (observation case (c)) is higher than the wind speed recorded by the drone (observation case (b)), as demonstrated in Fig. 3. Without direct wind speed observations (observation case (a)), the Bayesian inference algorithm tends to skew the posterior distribution toward higher wind speeds for most drone flights, as illustrated in Fig. 3. For all drone flights with weak sources, the wind speed posteriors for observation case (a) remain largely uninformed but are slightly skewed toward higher values.

560 For diffusivity, the posterior distribution in observation case (c) aligns with the direct observation, as shown in Fig. 3. In the absence of observations (observation cases (a) and (b)), the diffusivity posterior remains largely uninformed but slightly skewed toward higher values in drone flights with weaker sources as well as for the camel herd. For stronger sources, namely the cattle herds, the posterior distribution of diffusivity does often shift toward low values, as shown in Fig. 3.

A relationship was observed between the combination of high posterior wind speeds and high posterior diffusivity, resulting in higher estimated emission rates. Higher wind speed and diffusivity indicate a larger plume, both in length and width, suggesting a larger emission rate provided that the concentration observations are the same. The typically higher wind speeds derived from MOST, compared to drone wind speeds, combined with higher posterior diffusivity in observation case (c) compared to observation case (b), generally lead to higher emission rates in observation case (c) compared to observation case (b). This is demonstrated in Fig. 3. The observed relation highlights the importance of reliable wind measurements.

570 We consider observation case (a) the least reliable, as the wind speed estimates often skew toward excessively high values. Observation cases (b) and (c) present an interesting topic for future study: Is it more valuable to ~~have an anemometer on the drone to capture local and temporal~~ equip the drone with an anemometer to capture spatial wind variations, albeit potentially affected by the drone's downwash and motion, or to place ~~an anemometer close to the source at a fixed location and use MOST to obtain diffusivity observations?~~ a fixed anemometer near the source, which may provide more accurate observations and enable a more reliable application of MOST to derive diffusivity data? We hypothesize that a fixed anemometer may be the superior option within the current framework, which employs an advection-diffusion model based on mean wind conditions. In contrast, a mobile sensor may prove superior in frameworks that account for spatial variations in the wind field. Comparing different observing systems in controlled release experiments with a constant and known emission rate can provide further insights into the optimal experimental set-up for Bayesian inference observing systems.

580 Across all drone flights, the emission rate estimates for observation case (c) have a smaller relative uncertainty range compared to observation cases (a) and (b). Specifically, the range is approximately  $\pm 50\%$  for strong sources and  $\pm 12\%$  for weak sources, in contrast to  $\pm 65\%$  and  $\pm 26\%$  for observation case (a), and  $\pm 55\%$  and  $\pm 19\%$  for observation case (b), respectively.

We compare our estimates to IPCC Tier 1 values to assess their plausibility. It is important to note that IPCC Tier 1 values are highly uncertain, and we do not use these values as a definitive benchmark but rather as a sanity check. Overall, 585 the Bayesian inference emission rate estimates for both strong and weak sources are of the same order of magnitude as the IPCC Tier 1 values: ~~5.3 g head<sup>-1</sup> h<sup>-1</sup>~~ 5.3 g head<sup>-1</sup> h<sup>-1</sup> for dairy cattle in Africa, ~~5.3 g head<sup>-1</sup> h<sup>-1</sup>~~ 5.3 g head<sup>-1</sup> h<sup>-1</sup> for camels in developing countries, and ~~0.6 g head<sup>-1</sup> h<sup>-1</sup>~~ 0.6 g head<sup>-1</sup> h<sup>-1</sup> for sheep and goats in developing countries, with a reported uncertainty range of  ~~$\pm 30\%$  to  $\pm 50\%$~~   $\pm 30\%$  to  $\pm 50\%$  (Paustian et al., 2006). Despite large variations in the posterior estimates for wind direction, wind speed, and diffusivity, the emission rate estimates across all observation cases remain 590 ~~consistent with these reference~~ plausible when compared to the IPCC Tier 1 values. For example, for the drone flight presented in Fig. 3, the emission rate estimates of  ~~$7.2 \pm 1.4 \text{ g head}^{-1} \text{ h}^{-1}$ ,  $5.4 \pm 0.8 \text{ g head}^{-1} \text{ h}^{-1}$ , and  $7.4 \pm 0.7 \text{ g head}^{-1} \text{ h}^{-1}$~~   $7.2 \pm 1.4 \text{ g head}^{-1} \text{ h}^{-1}$ ,  $5.4 \pm 0.8 \text{ g head}^{-1} \text{ h}^{-1}$ , and  $7.4 \pm 0.7 \text{ g head}^{-1} \text{ h}^{-1}$  for observation cases (a) to (c) respectively, are considered feasible when compared to the Tier 1 value for dairy cattle in Africa. This underscores the importance of reliable concentration observations, as they alone (observation case (a)) can provide reasonable emission rate estimates.

595 Further improvement of the Bayesian inference method could involve extending the sampling duration to more accurately capture the time-averaged plume. Prolonging the sampling time at each observation location may require modifications to the likelihood function. For example, Hutchinson et al. (2019) used a sample duration of ~~5 s~~ 5 s and applied different likelihoods for concentration observations below and above a plume detection threshold. It is important to consider the trade-off between overall sampling duration and the number of sample locations. Investigating this trade-off, along with the formulation of the  
600 likelihood function, would be a valuable area for future study to improve the Bayesian inference method for estimating CH<sub>4</sub> emission rates. Such optimization could maximize the informational value derived from observations collected with a single battery set.

A promising approach to the information maximization strategy involves the use of autonomous drones that can make in-flight decisions about the optimal sampling path based on real-time observations and previously obtained knowledge. Several  
605 studies explore this possibility using reinforcement learning (Loisy and Eloy, 2022; van Hove et al., 2024b). However, these studies often rely on synthetic data, while research involving natural CH<sub>4</sub> sources under real-world conditions remains limited. Instead of addressing the information maximization strategy solely on the data collection side, exploring the capabilities of Bayesian hierarchical modeling (Berliner, 2003) to enhance the utilization of information in future research is potentially valuable. The hierarchical Bayesian approach allows information to be shared across drone flights, enabling data to be pooled  
610 across, for example, the two heifer drone flights in this study, or across all drone flights involving cattle.

### 3.1.2 Mass balance method

Figure 4 presents the mass balance results of the afternoon drone flight with a herd of heifers, on the same day as the satellite overpass. The panels show the interpolated CH<sub>4</sub> concentrations (top), perpendicular wind speed (middle), and resulting fluxes (bottom) at the four vertical sampling planes in NE, SE, SW, and NW directions. The sum of the fluxes in the bottom  
615 panel equals the final estimated emission rate for the entire herd  $Q$ . The results of the other drone flights are included in Fig. S25 to S45 in the Supplementary Material, and Table B1.

~~Figure 2 demonstrates~~ Figures 2 and 4 demonstrate the intermittency of the observed instantaneous plume: the concentrations within the plume do not follow a smooth, continuous gradient but instead exhibit an irregular distribution of disconnected patches of high concentration. This intermittency complicates the mass balance approach, particularly for drone flights where  
620 the signal-to-noise ratio is relatively low. Such conditions include: (a) highly variable wind direction or low wind speeds leading to very non-stationary wind conditions (the noise is particularly high), and (b) drone flights with weaker emission sources resulting in low concentration levels (the signal is particularly low) where the variability in the background concentrations and emission plume can considerably affect the accuracy of the emission rate estimate.

The mass balance approach relies on a nonzero horizontal wind to generate a horizontal outflow of CH<sub>4</sub> from the imaginary  
625 box. Its accuracy improves when the plume morphology remains relatively stable over time. Yang et al. (2018) defines favorable wind conditions as a wind speed greater than ~~2.3 ms<sup>-1</sup>~~ 2.3 ms<sup>-1</sup> and a steady wind direction with a standard deviation below 33.1°. Measurements collected under wind conditions that do not meet these criteria are marked with a diamond (♦) in Table B1. These sub-optimal conditions lead to less reliable estimates, as for example observed by the negative ~~mission~~ emission rate of



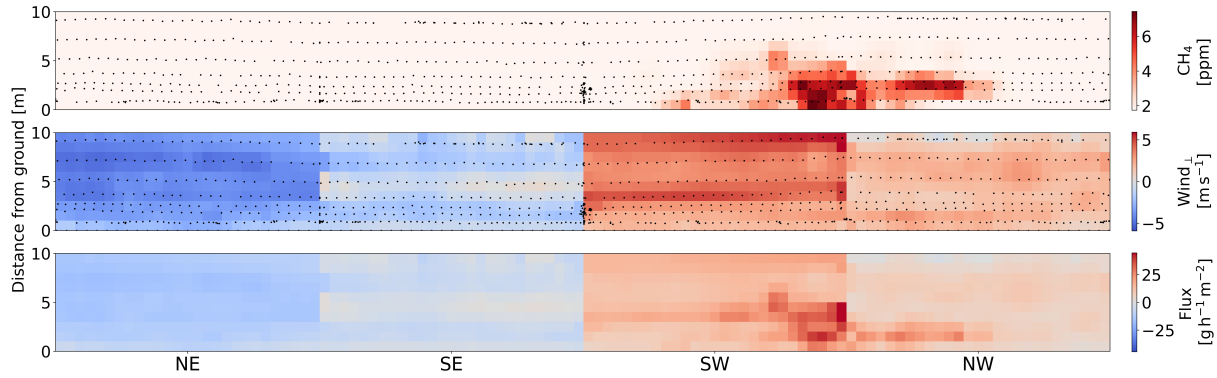

**Figure 4.** Results of the mass balance approach for a drone flight in the afternoon of 6 March 2024 with a herd of 208 heifers. The panels show (top) the interpolated  $\text{CH}_4$  concentration observations, (middle) the interpolated perpendicular wind speeds, and (bottom) the  $\text{CH}_4$  fluxes across the vertical sampling planes. Positive (negative) perpendicular wind speeds and fluxes correspond to flow out of (into) the box. The black scatter points indicate the original observation locations.

the morning drone flight with camels (Fig. S35). Consequently, these results should be considered unreliable due to unfavorable wind conditions.

Our observations indicate that the estimates for sheep and goats, marked by a triangle ( $\blacktriangle$ ) in Table B1, are very variable and inconsistent with the IPCC Tier 1 value of  $0.6 \text{ g head}^{-1} \text{ h}^{-1}$  (Paustian et al., 2006). Emissions from these smaller animals produce lower  $\text{CH}_4$  concentration levels, resulting in a lower signal-to-noise ratio when considering the size of the herd. Moreover, for sheep and goats, the emission source and consequently the plume, are close to the ground in a region characterized by generally lower wind speeds and complex surface effects caused by, for example, variations in elevation and vegetation. This may increase plume variability, leading to less reliable estimates. Due to these factors, we consider the mass balance estimates for drone flights with sheep and goats unreliable. The mass balance estimates for cattle are more plausible, as they are of the same order of magnitude as the IPCC Tier 1 value of  $5.3 \text{ g head}^{-1} \text{ h}^{-1}$  for dairy cattle in Africa (Paustian et al., 2006). While these Tier 1 values can provide a rough reference point, they should not be interpreted as exact estimates of  $\text{CH}_4$  emissions. The negative emission rate for camels in the morning is unrealistic, but the estimate in the afternoon is within a similar range as the IPCC Tier 1 value of  $5.3 \text{ g head}^{-1} \text{ h}^{-1}$  (Paustian et al., 2006).

To mitigate the effect of plume variability over time, several studies have conducted repeated drone flights (Gålfalk et al., 2021; Andersen et al., 2021). In the absence of systematic bias, this approach can yield a more robust approximation of the emission rate by averaging the estimates from multiple drone flights, thereby reducing - though not eliminating - uncertainty due to temporal variability. In a single drone flight, capturing the time-averaged plume can potentially be improved by increasing the number of plume observations relative to background observations. Several studies, particularly larger-scale experiments using airplanes, conduct flights along a single vertical sampling plane downwind from the prevailing wind direction (Allen et al., 2019; Cambaliza et al., 2014). The term  $c_{i,j}$  in Eq. (6) is then replaced by  $c_{i,j} - c_0$ , where  $c_0$  is the estimated background



concentration. However, this sampling approach introduces uncertainty due to the estimation of the background concentration,  
650 whose variability must be accounted for in the overall uncertainty estimate.

Although onboard wind measurements with a sonic anemometer are considered ideal (Allen et al., 2019), practical constraints have necessitated the use of nearby weather stations for wind data in several studies (Allen et al., 2019; Nathan et al., 2015). Morales et al. (2022) demonstrated through controlled release experiments that using wind data from an anemometer close to the source, which captures changing wind conditions during the flight, is more accurate than applying a wind profile  
655 through MOST (Eq. (A1)) that only accounts for wind speed variation with altitude. Given that we did not have an anemometer available on the drone, using corrected wind speeds from the flight controller was our best available option. An onboard anemometer could reduce measurement uncertainty of the instantaneous wind field, but it does not reduce uncertainty due to temporal uncertainty.

### 3.2 Method comparison

660 In this section, we evaluate the CH<sub>4</sub> emission rate results obtained ~~using the Bayesian inference method through Bayesian inference~~ by comparing them ~~to the results derived with results~~ from other methods and literature values. Figure 5 presents the Bayesian inference results for observation case (c) alongside estimates from the mass balance approach, a laser spectrometry study previously conducted at Kapiti by Wolz et al. (2022), and ~~the~~ IPCC emission values.

In Sec. 3.1.1 and 3.1.2, we ~~observed~~ found that the Bayesian inference results for all herds are of the same order of magnitude as the IPCC Tier 1 values. ~~Conversely, while~~ In contrast, our mass balance results for strong sources (cattle herds) ~~are fall~~ within the same order of magnitude as the IPCC Tier 1 values, ~~they while those for weak sources (sheep and goat herds)~~ are substantially higher than the IPCC Tier 1 values ~~for weak sources (sheep and goat herds) for a majority of in several~~ drone flights. ~~This finding is~~ This finding was further supported by comparison to the herd-specific IPCC Tier 2 values. ~~We observe that both the Bayesian inference and mass balance results are in the same order of magnitude as the~~,  
670 ~~which are generally regarded as more reliable, though they should not be considered definitive. We compared the average (pre- and post-grazing) emission rate estimates to the IPCC Tier 2 values for~~. We found a mean relative difference of 16% for the Bayesian inference results and a mean relative difference of 10% for the mass balance results across flights with strong sources of  ~~$Q \approx 700 \text{ g h}^{-1}$  to  $Q \approx 1,500 \text{ g h}^{-1}$~~   $Q \approx 700 \text{ g h}^{-1}$  to  $Q \approx 1,500 \text{ g h}^{-1}$  (Table B1). ~~However, a majority of the mass balance results are substantially higher than the IPCC Tier 2 values for~~ For the flights with weaker sources of  ~~$Q \approx 70 \text{ g h}^{-1}$  to  $Q \approx 140 \text{ g h}^{-1}$~~   $Q \approx 70 \text{ g h}^{-1}$  to  $Q \approx 140 \text{ g h}^{-1}$  (Table B1). ~~This inconsistency indicates~~, we observed a mean relative difference of 40% for the Bayesian inference results and a mean relative difference of 683% for the mass balance results. This disparity suggests that the source term estimation threshold of the Bayesian inference method is considerably lower than that of the mass balance method ~~as applied in our study, suggesting that Bayesian inference can be used to estimate~~. Consequently, Bayesian inference may be more effective in estimating weaker sources, where the mass balance method ~~might~~  
680 ~~fail to reliably estimate sources~~ may provide unreliable estimates.

We compare the Bayesian inference estimates to results from previous studies conducted at Kapiti. Our average (pre- and post-grazing) emission rate estimate for steers was  ~~$7.1 \pm 0.7 \text{ g h}^{-1}$~~   $7.1 \pm 0.7 \text{ g head}^{-1} \text{ h}^{-1}$ , which aligns with a respira-

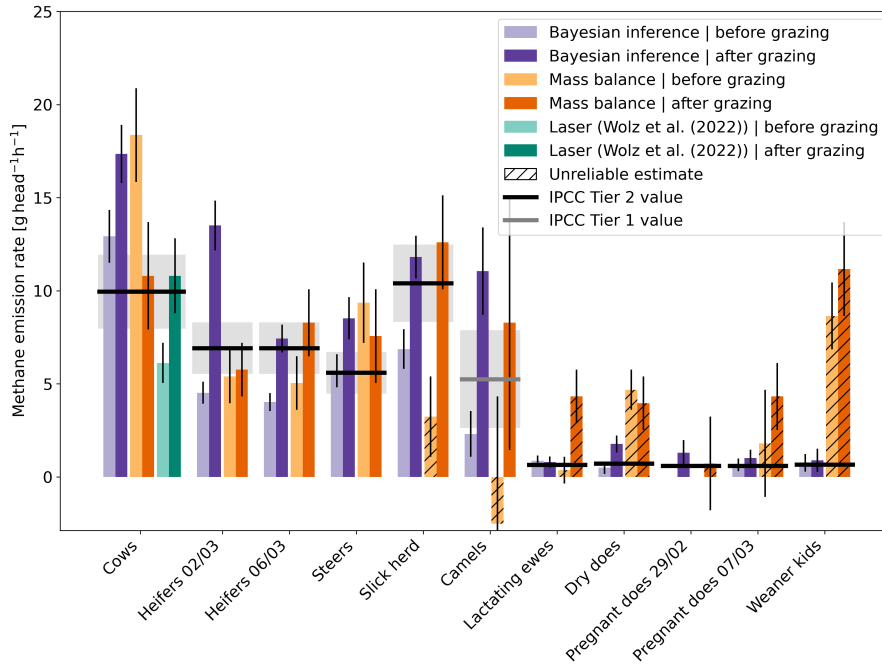

**Figure 5.** Methane emission rate estimates from the Bayesian inference method using concentration observations and mean wind speed, mean wind direction, and diffusivity data derived from Monin Obukhov Similarity Theory (observation case (c)), the mass balance approach, a laser spectrometry study by Wolz et al. (2022), and IPCC emission values factors converted from daily to hourly emission rates. Error bars represent one standard deviation uncertainty. The uncertainty range of IPCC values, depicted by gray shading, is  $\pm 20\%$ – $\pm 20\%$  for Tier 2 values and  $\pm 30\%$ – $\pm 30\%$  to  $\pm 50\%$ – $\pm 50\%$  for Tier 1 values (Paustian et al., 2006), this figure uses  $\pm 50\%$ – $\pm 50\%$  for the IPCC Tier 1 value. Unreliable mass balance estimates due to a low signal-to-noise ratio are indicated by hatched lines.

tion chamber experiment showing emission rates ranging from  $6.7\text{--}7.7\text{ g head}^{-1}\text{ h}^{-1}$   $6.7\text{--}7.7\text{ g head}^{-1}\text{ h}^{-1}$  depending on diet (Korir et al., 2022b). Our average emission rate estimate for lactating ewes was  $0.8 \pm 0.2\text{ g head}^{-1}\text{ h}^{-1}$   $0.8 \pm 0.2\text{ g head}^{-1}\text{ h}^{-1}$ ,  
 685 which overlaps with the emission rate for sheep ranging from  $0.6\text{--}0.8\text{ g head}^{-1}\text{ h}^{-1}$   $0.6\text{--}0.8\text{ g head}^{-1}\text{ h}^{-1}$  found in a respiration chamber experiment (Mwangi et al., 2023). Our estimate is on the higher end, which is expected as emissions from lactating animals are generally larger than those from non-lactating animals due to their increased feed intake to meet the energy demands of milk production (Broucek, 2014). In another respiration chamber experiment, the estimated emission rates from cows ranged from  $7.6\text{--}11.3\text{ g head}^{-1}\text{ h}^{-1}$   $7.6\text{--}11.3\text{ g head}^{-1}\text{ h}^{-1}$  depending on diet (Korir et al., 2022a). In contrast,  
 690 our average estimate was notably higher at  $15.2 \pm 1.0\text{ g head}^{-1}\text{ h}^{-1}$   $15.2 \pm 1.0\text{ g head}^{-1}\text{ h}^{-1}$ .

Wolz et al. (2022) utilized open-path laser spectroscopy with backward Lagrangian stochastic dispersion modeling to estimate nighttime  $\text{CH}_4$  emissions from a mixed cattle herd across 14 nights in September and October 2019. The resulting mean emission rates  $Q$  were normalized to the equivalent weight of a cow to obtain  $q$  for a hypothetical cow herd, rather than normalizing by the number of animals to obtain  $q$  for the observed mixed cattle herd. Figure 5 shows the results obtained at 09:00 East

695 Africa Time (EAT), before grazing, and at 00:30 EAT, after grazing. Note that the latter nocturnal measurements were obtained later than our drone flights, which were conducted in the afternoon. We observe that our Bayesian inference results for cows are higher, both before and after grazing, compared to estimates from Wolz et al. (2022). This ~~discrepancy~~ difference could be due to an overestimation by the Bayesian inference method, or the emission rate might have been this high at the times of the drone flights. Wolz et al. (2022) reported a mean emission rate over 14 repeated experiments, whereas the Bayesian inference  
700 result is an estimate based on a single drone flight. Additionally, differences in methodology, differences in the timing of the measurements, and the herd weight normalization used by Wolz et al. (2022) could contribute to the ~~variance~~ discrepancies. Both studies were conducted at the end of a dry season; however, our field campaign was conducted during a normal dry season, whereas the dry season studied by Wolz et al. (2022) was extreme. The severity of this dry season likely affected feed intake and feed quality, potentially reducing CH<sub>4</sub> emission rates.

705 No camel studies have previously been conducted in Kapiti, so we compared our Bayesian inference results for camels to those of a respiration chamber experiment conducted in Australia by Dittmann et al. (2014). This study estimated a CH<sub>4</sub> emission rate of ~~4.0 g head<sup>-1</sup> h<sup>-1</sup>~~ 4.0 g head<sup>-1</sup> h<sup>-1</sup> for Bactrian camels fed exclusively on alfalfa. Our average (pre- and post-grazing) estimate is higher at ~~6.7 ± 1.3 g head<sup>-1</sup> h<sup>-1</sup>~~ 6.7 ± 1.3 g head<sup>-1</sup> h<sup>-1</sup>. Note that the studies involve different camel species and diets. ~~Our average estimate aligns better with the IPCC Tier 1 value of 5.3 g head<sup>-1</sup> h<sup>-1</sup>.~~ We emphasize that the  
710 number of experiments conducted with camels and the extent of current knowledge are minimal, and that further research is required to gain more insight into the emissions of CH<sub>4</sub> from camels. Based on Bayesian inference, we observe a larger increase in estimated CH<sub>4</sub> production after grazing in camels compared to cattle. Replication of this result through repeated experiments would be a promising avenue for further research.

Feeding is known to increase CH<sub>4</sub> production in ruminants (Amon et al., 2001; Hegarty, 2013), ~~and we assess whether~~  
715 ~~this effect is observable in our results for the other herds as well. The~~ Using a one-sided Student's t-test (Student, 1908)  
on the relative difference in emissions pre- and post-grazing across all animal groups, we found a statistically significant  
effect of grazing for the Bayesian inference results ~~show the hypothesized effect of grazing in~~ (p-value = 0.009), but not for  
the mass balance results (p-value = 0.194). ~~We observe that~~ seven out of ten ~~cases, with considerably higher emission rate~~  
~~estimates~~ Bayesian inference cases have markedly higher mean emission rates in the afternoon compared to the morning. ~~In~~  
720 ~~the cases of~~ For pregnant does and weaner kids, ~~although there is a general increase in emission estimates before and while~~  
the emission estimates increase after grazing, ~~the~~ considerable overlap in the uncertainty ranges makes the effect ~~less clear.~~  
~~For the final~~ ambiguous. In the case of lactating ewes, the difference in emissions before and after grazing is ~~slightly negative;~~  
~~however, the uncertainty ranges overlap, making the effect inconclusive~~ only slightly negative and also ambiguous. In contrast,  
the mass balance results do not consistently demonstrate an increase in CH<sub>4</sub> emissions post-grazing, with ~~a substantial increase~~  
725 substantial increases observed in only ~~three~~ two out of ten cases ~~heifers 06/03, slick herd, the slick herd~~ and lactating ewes.  
We consider this to be a promising indicator for the greater reliability and accuracy of our Bayesian inference results compared to our mass balance results.

~~With the exception of the cows and lactating ewes drone flights, the Bayesian inference estimates pre-grazing are lower than the IPCC Tier 2 value, and the post-grazing estimates are higher than the IPCC Tier 2 value, or the uncertainty ranges of the different methods overlap.~~

One advantage of using the Bayesian inference method over the ~~IPPC~~ IPCC Tier 2 approach is the ability to estimate diurnal variations, which allows us to observe the effects of feeding. Additionally, the uncertainty in the Bayesian inference results can typically be reduced by assimilating a larger dataset, suggesting that repeated drone flights can yield more reliable results (Pirk et al., 2022). Deriving ~~IPPC~~ IPCC Tier 2 values is time-consuming due to the measurement of live weight and live weight changes of individual animals, and considerable unquantified uncertainty remains in our ability to estimate the feed intake of animals in pastoral systems like at Kapiti. Furthermore, the accuracy of the method relies partly on the accuracy of the methane conversion factor  $Y_m$ , which is determined based on previous research and may not be representative of the specific animals being studied.

In comparison to the Bayesian inference method, the mass balance approach is more straightforward to ~~implement~~ use due to its smaller model complexity, which requires less coding and reduces the need for parameter tuning. However, based on this study, Bayesian inference results can be more reliable, as demonstrated by the consistent observation of increased emissions post-grazing ~~-, as shown in Fig. 5.~~ In both the mass balance method and the Bayesian inference method, we use a sensor - a drone - to capture snapshots of a non-stationary emission plume. However, the physical models of both methods - Eq. (1) for our Bayesian inference approach and Eq. (6) for the mass balance method - are based on the assumption of a statistically stationary plume. A conceptual difference between the two methods lies in how they handle the discrepancy between the turbulent (instantaneous) observations acquired by the drone and the mean concentration and mean wind field represented in the model. The Bayesian inference method explicitly accounts for this discrepancy through observation error  $R$ , while the mass balance approach does not explicitly address this inconsistency. Instead, we only account for this violation implicitly by including a temporal variation term within the uncertainty range of the mass balance estimates. We observed that the mass balance approach estimates are sensitive to low signal-to-noise levels, making the resulting estimates of weaker sources and under highly variable wind conditions unreliable. In contrast, the Bayesian inference method proved to be more robust in estimating weaker sources and under variable wind conditions. This robustness may be attributed to explicitly accounting for discrepancies between instantaneous observations and the assumed stationarity of the concentration and wind fields in the physical model.

## 4 Conclusions

### 3.1 Source detection through satellite observations

~~In our study, we leveraged drone and flux tower observations along with a Bayesian inference approach to quantify~~

Figure 6 shows a true color image of part of Kapiti, captured by the PRISMA satellite on 6 March 2024. Despite the partly cloudy conditions, the irregular cloud cover did not occlude the satellite observations of all three cattle herds within our study area. Maps (b) to (d) show the SR index for a region of 5 by 5 pixels with a spatial resolution of 30m, across three different

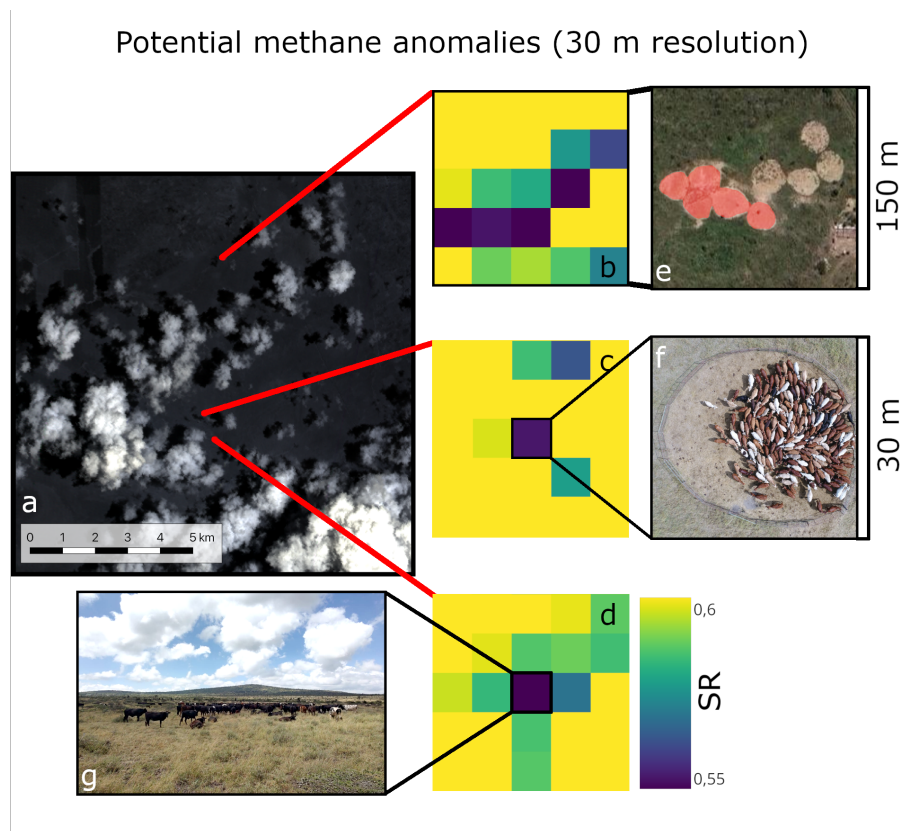

**Figure 6.** (a) PRISMA true color image of Kapiti from 6 March 2024 08:00 Coordinated Universal Time (UTC) + 3 hours, corresponding to East Africa Time. (b) to (d) The Simple Ratio (SR) radiance index of 2300/2100 nm with 30 m resolution for three distinct sites: (e) five adjacent bomas (shaded red) housing 583 cows at the time of the satellite overpass but empty in this picture, (f) a single boma at the drone field site with 206 heifers, and (g) a free-grazing herd of 148 heifers. (e) includes ©Google Satellite Imagery (2021). PRISMA product derived from L1 2024-03-06 ©Italian Space Agency (ASI) (2024). All rights reserved.

sites with (e) five adjacent bomas housing 583 cows, (f) the boma at the drone field site with 206 heifers, and (g) a free-grazing herd of 148 heifers, respectively.

We observed a lower SR index at the herd locations compared to the surrounding background. Specifically, we detected anomalies with the two herds inside a boma against a bare soil background, as well as the free-grazing herd against a green vegetation background. These SR anomalies, which indicate relatively low radiance levels in the  $\text{CH}_4$  emissions of ruminants in sub-Saharan Africa—an important, yet poorly understood, source in the global absorption feature, may suggest higher atmospheric  $\text{CH}_4$  emission inventory. We showed how this method can be applied to verify and estimate concentrations, pointing to the presence of a  $\text{CH}_4$  source. However, since the estimated emission rates of the herds are well below the expected detection limits for point sources from PRISMA of approximately  $500 \text{ kg h}^{-1}$  (Guanter et al., 2021), caution should be taken in interpreting this result. Importantly, this lower SR level may also arise from features associated with grazing

or the herd's presence, such as changes in vegetation cover or soil disturbance. Although our limited dataset prevents us from evaluating whether the observed anomalies are related to emissions or landscape features, these preliminary results call for more in-depth investigation on the proposed approach for detecting the location of potential CH<sub>4</sub> sources ~~identified through radiance anomalies observed in hyperspectral satellite data~~ using last-generation high resolution hyperspectral satellite missions. Further dedicated studies are necessary to evaluate the generalizability of these findings.

The use of hyperspectral satellite data for detecting potential CH<sub>4</sub> source locations marks an initial step towards mapping regional CH<sub>4</sub> emissions. By identifying areas of interest, we can strategically target drone campaigns to investigate these potential source locations. In our study focused on ruminant herds, the source locations were already known. However, detecting potential source locations from satellite imagery can be particularly useful in regions such as thawing permafrost landscapes, where CH<sub>4</sub> source locations are typically unknown.

### 3.2 Bayesian lessons learned

~~While Bayesian inference is regularly applied on regional and global scales to detect and estimate carbon emissions using satellite observations and international sensor networks, its application on smaller spatial scales with weaker sources, such as the livestock herds in our study, is limited. Our work demonstrates the feasibility and effectiveness of using Bayesian inference methods with drone and flux tower observations for source term estimation on local scales.~~ Here, we share our experiences in quantifying CH<sub>4</sub> emissions using ~~this approach~~ [Bayesian inference with drone and flux tower observations](#), with the aim of advancing ~~research in~~ local source term estimation through Bayesian inference.

(1) Rather than treating the herd as a single point source, we modeled it as a set of sources with equal strengths, which we found to be more accurate. Modeling the herd as a single point source led to higher inferred mean diffusivity in most drone flights due to the large horizontal spread of instantaneous observed elevated concentrations above background level.

(2) We assumed the set of source locations to be fixed known parameters. When treated as an unknown parameter, the posterior distribution for source location broadened along the prevailing wind direction and increased the uncertainty in the emission rate estimates. This can be attributed to equifinality: a stronger source further away can produce a similar concentration observation as a weaker source nearby. Incorporating concentration data collected around the source enhanced the accuracy of source location posteriors. We tested this by incorporating the observations of the mass balance flights.

(3) We observed equifinality across multiple parameter combinations, implying that incorporating observations related to unknown parameters is beneficial and may even be necessary to adequately constrain their probability distributions. While wind direction can be effectively constrained using concentration observations alone, wind speed measurements - such as those from the drone or flux tower - considerably ~~enhanced~~ [enhance](#) the inference process. Further research is recommended to identify the most reliable observational platform for this purpose. Diffusivity proved difficult to constrain based on instantaneous concentration observations alone, but we observed that diffusivity observations derived from eddy-covariance data helped to constrain the diffusivity probability distribution.

(4) We restricted the uniform prior for wind direction to a half wind-rose aligned with the prevailing wind direction. Using the entire wind-rose introduced ambiguity between upwind observations of strong sources and downwind observations of weak

805 sources, specifically in drone flights with herds of sheep and goats. Incorporating concentration observations around the source can help mitigate this ambiguity.

(5) Treating the background concentration as a known parameter was necessary in this study because the Bayesian inference algorithm struggled to infer reliable estimates in several drone flights when this parameter was considered unknown, leading to unreliable emission rate inferences. The algorithm struggled to distinguish between background and elevated concentrations without relying on this assumption. We anticipate that using concentration observations obtained over longer sampling times, 810 with an adjusted likelihood function, could potentially address this issue.

(6) The biggest challenge in setting up the Bayesian framework ~~in our study~~ was the mismatch between instantaneous concentration observations and the time-averaged dispersion model, which complicated the design of the likelihood function. A broad Gaussian likelihood proved effective. Still, we recommend further investigation into the likelihood design, in combination with extended sampling times to better capture the time-averaged emission plume. However, longer sampling times reduce 815 the number of locations that can be observed on a single drone battery charge. This limitation makes intelligent sampling path design a promising topic for further study.

### 3.3 ~~Insights into CH<sub>4</sub> emission detection and estimation from ruminants~~

## 4 Conclusions

820 ~~By analyzing radiance anomalies in hyperspectral PRISMA satellite data, we detected three cattle herds present at Kapiti Research Station in Kenya. Using the ratio between radiance in the 2300nm and 2100nm bands, we showed that it is feasible to locate herds within a boma and free-grazing herds. In particular, this approach allows us to identify the location of potential~~  
In our study conducted in Kenya, we leveraged drone and flux tower observations alongside a Bayesian inference approach to estimate CH<sub>4</sub> sources emitting approximately 1,000 g h<sup>-1</sup> or more. While the detection of the location of potential  
825 emissions from ruminants - an important, yet poorly understood, contributor to the global CH<sub>4</sub> sources, such as cattle herds, is feasible using current satellite data, higher-resolution observations are necessary to accurately estimate their emission inventory. Furthermore, we showed that anomalies detected in the SWIR spectrum of hyperspectral satellite data may indicate the presence of CH<sub>4</sub> emission rates, sources.

### 4.1 Insights into CH<sub>4</sub> emission detection and estimation from ruminants

830 Using drone observations, we estimated the CH<sub>4</sub> emission rates of various ruminant herds - including cattle (cows, heifers, steers, and slick herd), sheep (lactating ewes), goats (dry does, pregnant does, weaner kids), and camels - ~~by~~ applying both Bayesian inference and mass balance ~~approaches~~methods. Due to low signal-to-noise levels, the mass balance method did not consistently provide reliable estimates for weaker sources, such as the sheep and goat herds. However, under favorable wind conditions, we estimated cattle herd emissions ranging between 700 – 1,500 g h<sup>-1</sup> ~~using the mass balance method. The~~. In  
835 contrast, the Bayesian inference method performed better for weaker sources, estimating sheep and goat herd emissions in the range of 70 – 140 g h<sup>-1</sup>, ~~and while~~ it was effective for the different cattle and camel herds as well.



We observed the hypothesized increase in CH<sub>4</sub> production following feeding in ~~a majority of the~~ the majority of Bayesian inference drone flights, whereas this effect was ~~visible in only a minority of~~ much less discernible in the mass balance flights. Additionally, the Bayesian inference method results appeared less affected by variable wind conditions ~~than the mass balance~~ method. These observations suggest the superior performance of the Bayesian inference method, further suggesting its superior performance over the mass balance method in this setting study.

Overall, the Bayesian inference results aligned with the IPCC Tier 2 emission values. ~~Compared to the IPCC Tier 2 approach,~~ the Bayesian inference method offers the, indicating compatibility without implying mutual validation. The method's benefits lie in its ability to estimate temporal variations in CH<sub>4</sub> production. ~~Furthermore, the method can,~~ as well as its capacity to assimilate observations from various measurement platforms ~~and incorporate~~ while incorporating their uncertainties. The ~~strong robust~~ performance of the Bayesian inference approach in this case study, estimating diverse CH<sub>4</sub> source strengths under various atmospheric conditions, underscores its ~~robustness and~~ potential as a valuable ~~method tool~~ for estimating CH<sub>4</sub> ~~sources in agricultural areas~~ emissions in agricultural systems and other landscapes.

In an exploratory analysis, we detected anomalies in the SWIR spectrum from hyperspectral satellite data associated with two cattle herds on bare soil and one herd on grassland. Further research is needed to ascertain whether these anomalies correlate directly with increased CH<sub>4</sub> concentrations or if they resulted from other features related to the herd's presence or grazing activities. Ultimately, the ability to identify potential emission plumes - even from relatively low-emission sources like the cattle herds in our study, which were emitting approximately 1,000 g h<sup>-1</sup> - represents a promising initial step toward mapping regional CH<sub>4</sub> emissions in landscapes where the precise source locations are unknown.

## 4.2 Future applications

~~We demonstrated the potential of the Bayesian inference method to estimate a range of source strengths. Specifically, we showed that potential CH<sub>4</sub> sources detected by hyperspectral satellites, but too weak to be confidently quantified, can be effectively estimated using drone observations.~~ Future applications of the Bayesian framework for source term estimation could extend to diverse natural and anthropogenic sources, ~~such as including~~ CH<sub>4</sub> emissions from wetlands, ~~hotspots in~~ thawing permafrost, landfills, and wastewater disposal sites. Our ultimate aim is to leverage Bayesian inference to comprehensively map these areas, thereby improving our understanding of spatial variations in emissions across diverse landscapes. While the framework is readily applicable to point-like sources, such as thermokarst hotspots, future research should focus on adapting this framework to infer emissions from landscapes characterized by multiple sparse sources that may vary in size and produce overlapping emission plumes. This adaptation may require not only precise estimation of emission rates but also accurate localization of these sources.

In ~~areas~~ regions where observational data are sparse, the Bayesian inference method can be employed using a gas sensor and an anemometer mounted on the drone or positioned near the source. This approach could eliminate the need for a nearby flux tower, making the observing framework suitable for remote sites. Conversely, in observation-rich environments, the Bayesian inference method can integrate data from multiple observation platforms. For example, data obtained from laser spectrometry or observations from multiple drones can be assimilated to improve the accuracy of emission estimates.



Overall, the insights gained ~~in~~from our study demonstrate the potential of Bayesian inference methods, combined with drone and flux tower observations, for ~~improving~~enhancing our understanding of CH<sub>4</sub> emissions at local scales, thereby contributing to the improvement of CH<sub>4</sub> inventories and mitigation studies.

*Code and data availability.* The drone and flux tower data set, along with the Digital Elevation Model of Kapiti, can be accessed from van Hove et al. (2024a). The data processing scripts are available at <https://github.com/AlouetteUiO/MIK>.

## Appendix A: MOST

Obukhov length  $L$  [m] is positive in stable atmospheric conditions and negative in unstable atmospheric conditions. During all drone flights, the atmosphere was unstable. We use Monin Obukhov Similarity Theory (MOST; see Stull, 1989; Hanna et al., 1982) to estimate the vertical profile of the mean wind speed  $V(z)$  [m s<sup>-1</sup>] and mean eddy diffusivity  $K(z)$  [m<sup>2</sup> s<sup>-1</sup>], where  $z$  is the distance above the ground.

Under unstable atmospheric conditions, the mean wind speed profile is estimated by

$$V(z) = \frac{u_*}{\kappa} \left[ \ln \left( \frac{z-d}{z_0} \right) - 2 \ln \left( \frac{1}{2} \left( 1 + \frac{1}{\Phi_M} \right) \right) - \ln \left( \frac{1}{2} \left( 1 + \frac{1}{\Phi_M^2} \right) \right) + 2 \arctan \left( \frac{1}{\Phi_M} \right) - \frac{\pi}{2} \right], \quad (\text{A1})$$

where  $u_*$  is the friction velocity,  $\kappa = 0.4$  is the von Kármán constant, and  $z_0$  ~~is~~ [m] is the aerodynamic roughness length. We use  ~~$z_0 = 0.05$  m~~ $z_0 = 0.05$  m, which corresponds to terrain with long grass and few trees (Stull, 1989), and a displacement height of  $d = 0.10$  m. The dimensionless wind shear  $\Phi_M$  is approximated by

$$\Phi_M \left( \frac{z}{L} \right) = \left[ 1 - 15 \frac{z-d}{L} \right]^{-1/4}. \quad (\text{A2})$$

The resulting mean wind speed at the height of the sonic anemometer on the flux tower qualitatively matches the mean wind speeds measured by the same sonic anemometer (Fig. S3 in Supplementary Material).

The eddy diffusivity for effectively passive tracers such as CH<sub>4</sub> is generally assumed to be equal to the eddy diffusivity for heat. The mean eddy diffusivity profile is given by

$$K(z) = \kappa u_* \frac{z-d}{\Phi_H}, \quad (\text{A3})$$

where  $\Phi_H$  is the dimensionless potential temperature gradient. For unstable atmospheric conditions, it is assumed to be given by

$$\Phi_H \left( \frac{z}{L} \right) = 0.74 \left[ 1 - 9 \frac{z-d}{L} \right]^{-1/2}. \quad (\text{A4})$$

## 895 Appendix B: Results table

*Author contributions.* Conceptualization: AvH, NP, KA. Methodology: AvH, KA, NP. Software: AvH. Formal analysis: AvH (drone-based methods), VL (IPCC Tier 2 values), RC (satellite data). Investigation: AvH and JH (drone flights), VO (eddy-covariance data), RC and FF (satellite data). Resources: CA (host at Kapiti and coordination field campaign). Writing - Original Draft: AvH. Writing - Review & Editing: KA, NP, VL, CA, RC, VO, FF, AvH. Visualization: AvH, RC (Fig. 6). Funding acquisition: VL, NP, CA, FF.

900 *Competing interests.* The authors declare that they have no conflict of interest.

*Acknowledgements.* We would like to thank Ilona Gluecks from ILRI for providing information about the different ruminant herds at Kapiti, and Endale Balcha Gurmu from ILRI for assisting with the IPCC Tier 2 workflow. Furthermore, we would like to thank Nehemiah Kimengich, Nelson Kipchirchir and Elly Kibira at Kapiti for their assistance in the field. [We would also like to thank Lutz Merbold for his contribution to the flux tower data.](#) Moreover, we would like to thank Luc Girod from UiO for his help with drone imagery processing. This study contains modified data of the PRISMA satellite of ESA - Agenzi Spaziale Italiana (ASI) [Year 2024]. We would like to thank Monica Pepe from CNR and Patrizia Sacco from ASI for the data procurement. This work was supported by the Research Council of Norway (projects #333232 (CircAgric-GHG) and #301552 (Spot-On)) and the European Research Council (project #101116083 (ACTIVATE)). This work is a contribution to the strategic research initiative LATICE (#UiO/GEO103920), the Center for Biogeochemistry in the Anthropocene, as well as the Center for Computational and Data Science at the University of Oslo. This study was supported by the CGIAR Initiatives Livestock and Climate and Mitigate+: Low-Emission Food Systems, which are supported by contributors to the CGIAR Trust Fund. This work was supported by the European Union through the EU-DeSIRA ESSA project (Earth observation and environmental sensing for climate-smart sustainable agropastoralism ecosystem transformation in East Africa). The content of this article is the sole responsibility of the authors and does not necessarily reflect the views of the European Union.

## References

- 915 Abichandani, P., Lobo, D., Ford, G., Bucci, D., and Kam, M.: Wind Measurement and Simulation Techniques in Multi-Rotor Small Unmanned Aerial Vehicles, *IEEE Access*, 8, 54 910–54 927, <https://doi.org/10.1109/ACCESS.2020.2977693>, 2020.
- Allen, G., Hollingsworth, P., Kabbabe, K., Pitt, J. R., Mead, M. I., Illingworth, S., Roberts, G., Bourn, M., Shallcross, D. E., and Percival, C. J.: The development and trial of an unmanned aerial system for the measurement of methane flux from landfill and greenhouse gas emission hotspots, *Waste Management*, 87, 883–892, <https://doi.org/10.1016/j.wasman.2017.12.024>, 2019.
- 920 Amon, B., Amon, T., Boxberger, J., and Alt, C.: Emissions of NH<sub>3</sub>, N<sub>2</sub>O and CH<sub>4</sub> from dairy cows housed in a farm-yard manure tying stall (housing, manure storage, manure spreading), *Nutrient Cycling in Agroecosystems*, 60, 103–113, <https://doi.org/10.1023/A:1012649028772>, 2001.
- Andersen, T., Vinkovic, K., De Vries, M., Kers, B., Necki, J., Swolkien, J., Roiger, A., Peters, W., and Chen, H.: Quantifying methane emissions from coal mining ventilation shafts using an unmanned aerial vehicle (UAV)-based active AirCore system, *Atmospheric Environment: X*, 12, 100 135, <https://doi.org/10.1016/j.aeaoa.2021.100135>, 2021.
- 925 Anderson, G.: Error propagation by the Monte Carlo method in geochemical calculations, 40, 1533–1538, [https://doi.org/10.1016/0016-7037\(76\)90092-2](https://doi.org/10.1016/0016-7037(76)90092-2), 1976.
- Arndt, C., Leytem, A., Hristov, A., Zavala-Araiza, D., Cativiela, J., Conley, S., Daube, C., Faloona, I., and Herndon, S.: Short-term methane emissions from 2 dairy farms in California estimated by different measurement techniques and US Environmental Protection Agency inventory methodology: A case study, *Journal of Dairy Science*, 101, 11 461–11 479, <https://doi.org/10.3168/jds.2017-13881>, 2018.
- 930 Bai, M., Velazco, J. I., Coates, T. W., Phillips, F. A., Flesch, T. K., Hill, J., Mayer, D. G., Tomkins, N. W., Hegarty, R. S., and Chen, D.: Beef cattle methane emissions measured with tracer-ratio and inverse dispersion modelling techniques, *Atmospheric Measurement Techniques*, 14, 3469–3479, <https://doi.org/10.5194/amt-14-3469-2021>, 2021.
- Baldwin, R., McLeod, K., Klotz, J., and Heitmann, R.: Rumen Development, Intestinal Growth and Hepatic Metabolism In The Pre- and Postweaning Ruminant, *Journal of dairy science*, 87, E55–E65, 2004.
- 935 Banner, K. M., Irvine, K. M., and Rodhouse, T. J.: The use of Bayesian priors in Ecology: The good, the bad and the not great, *Methods in Ecology and Evolution*, 11, 882–889, <https://doi.org/10.1111/2041-210X.13407>, 2020.
- Berliner, L. M.: Physical-statistical modeling in geophysics, *JOURNAL OF GEOPHYSICAL RESEARCH*, 108, 8776, <https://doi.org/10.1029/2002JD002865>, 2003.
- 940 Borchardt, J., Gerilowski, K., Krautwurst, S., Bovensmann, H., Thorpe, A. K., Thompson, D. R., Frankenberg, C., Miller, C. E., Duren, R. M., and Burrows, J. P.: Detection and quantification of CH<sub>4</sub> plumes using the WFM-DOAS retrieval on AVIRIS-NG hyperspectral data, *Atmospheric Measurement Techniques*, 14, 1267–1291, <https://doi.org/10.5194/amt-14-1267-2021>, 2021.
- Broucek, J.: Production of Methane Emissions from Ruminant Husbandry: A Review, *Journal of Environmental Protection*, 05, 1482–1493, <https://doi.org/10.4236/jep.2014.515141>, 2014.
- 945 Brown, L. R., Benner, D. C., Champion, J. P., Devi, V. M., Fejard, L., Gamache, R. R., Gabard, T., Hilico, J. C., Lavorel, B., Loete, M., Mellau, G. C., Nikitin, A., Pine, A. S., Predoi-Cross, A., Rinsland, C. P., Robert, O., Sams, R. L., Smith, M. A., Tashkun, S. A., and Tyuterev, V. G.: Methane line parameters in HITRAN, *Journal of Quantitative Spectroscopy and Radiative Transfer*, 82, 219–238, [https://doi.org/10.1016/S0022-4073\(03\)00155-9](https://doi.org/10.1016/S0022-4073(03)00155-9), 2003.

- Burba, G.: Eddy Covariance Method for Scientific, Industrial, Agricultural and Regulatory Applications: A Field Book on Measuring Ecosystem Gas Exchange and Areal Emission Rates, LI-COR Biosciences, ISBN 978-0-615-76827-4, <https://doi.org/10.13140/RG.2.1.4247.8561>, 2013.
- Burgués, J. and Marco, S.: Environmental chemical sensing using small drones: A review, *Science of The Total Environment*, 748, 141–172, <https://doi.org/10.1016/j.scitotenv.2020.141172>, 2020.
- Busetto, L. and Ranghetti, L.: prismaread: A tool for facilitating access and analysis of PRISMA L1/L2 hyperspectral imagery v1. 0.0, URL: <https://lbusett.github.io/prismaread/><https://doi.org/10.5281/zenodo.4019081>, 2020.
- Calder, K. L.: Multiple-source plume models of urban air pollution—their general structure, *Atmospheric environment*, 11, 403–414, 1977.
- Cambaliza, M. O. L., Shepson, P. B., Caulton, D. R., Stirr, B., Samarov, D., Gurney, K. R., Turnbull, J., Davis, K. J., Possolo, A., Karion, A., Sweeney, C., Moser, B., Hendricks, A., Lauvaux, T., Mays, K., Whetstone, J., Huang, J., Razlivanov, I., Miles, N. L., and Richardson, S. J.: Assessment of uncertainties of an aircraft-based mass balance approach for quantifying urban greenhouse gas emissions, *Atmospheric Chemistry and Physics*, 14, 9029–9050, <https://doi.org/10.5194/acp-14-9029-2014>, 2014.
- Chopin, N.: A sequential particle filter method for static models, *Biometrika*, 89, 539–552, <https://doi.org/10.1093/biomet/89.3.539>, 2002.
- Chopin, N. and Papaspiliopoulos, O.: An Introduction to Sequential Monte Carlo, Springer Series in Statistics, Springer Nature, Cham, 1st edition 2020 edn., ISBN 9783030478452, 2020.
- Crazzolara, C., Ebner, M., Platis, A., Miranda, T., Bange, J., and Junginger, A.: A new multicopter-based unmanned aerial system for pollen and spores collection in the atmospheric boundary layer, *Atmospheric Measurement Techniques*, 12, 1581–1598, <https://doi.org/10.5194/amt-12-1581-2019>, 2019.
- Cusworth, D. H., Bloom, A. A., Ma, S., Miller, C. E., Bowman, K., Yin, Y., Maasakkers, J. D., Zhang, Y., Scarpelli, T. R., Qu, Z., Jacob, D. J., and Worden, J. R.: A Bayesian framework for deriving sector-based methane emissions from top-down fluxes, *Communications Earth & Environment*, 2, 242, <https://doi.org/10.1038/s43247-021-00312-6>, 2021.
- Daube, C., Conley, S., Faloona, I. C., Arndt, C., Yacovitch, T. I., Roscioli, J. R., and Herndon, S. C.: Using the tracer flux ratio method with flight measurements to estimate dairy farm CH<sub>4</sub> emissions in central California, *Atmospheric Measurement Techniques*, 12, 2085–2095, <https://doi.org/10.5194/amt-12-2085-2019>, 2019.
- Dittmann, M. T., Runge, U., Lang, R. A., Moser, D., Galeffi, C., Kreuzer, M., and Clauss, M.: Methane Emission by Camelids, *PLoS ONE*, 9, e94363, <https://doi.org/10.1371/journal.pone.0094363>, 2014.
- Dogniaux, M., Maasakkers, J. D., Varon, D. J., and Aben, I.: Report on Landsat 8 and Sentinel-2B observations of the Nord Stream 2 pipeline methane leak, *Atmospheric Measurement Techniques*, 17, 2777–2787, <https://doi.org/10.5194/amt-17-2777-2024>, 2024.
- Doucet, A. and Johansen, A. M.: A Tutorial on Particle Filtering and Smoothing: Fifteen years later, *Handbook of Nonlinear Filtering*, 12, 2009.
- Evangeliou, N., Thompson, R. L., Eckhardt, S., and Stohl, A.: Top-down estimates of black carbon emissions at high latitudes using an atmospheric transport model and a Bayesian inversion framework, *Atmospheric Chemistry and Physics*, 18, 15307–15327, <https://doi.org/10.5194/acp-18-15307-2018>, 2018.
- Francis, A., Li, S., Griffiths, C., and Sienz, J.: Gas source localization and mapping with mobile robots: A review, *Journal of Field Robotics*, <https://doi.org/10.1002/rob.22109>, 2022.
- Gavrilova, O., Leip, A., Dong, H., Macdonald, J., Gomez, C., Amon, B., Barahona Rosales, R., Agustin, Del Prado, A., Lima, M., Oyhantcabal, W., Weerden, T., Widiawati, Y., Bannink, A., Beauchemin, K., Clark, H., Leytem, A., Kebreab, E., Ngwabie, N., and Vellinga,

- T.: Emissions from livestock and manure management, in: 2019 Refinement to the 2006 IPCC Guidelines for National Greenhouse Gas Inventories, IPCC, 2019.
- Giardino, C., Bresciani, M., Braga, F., Fabbretto, A., Ghirardi, N., Pepe, M., Gianinetto, M., Colombo, R., Cogliati, S., Ghebrehiwot, S., Laanen, M., Peters, S., Schroeder, T., Concha, J. A., and Brando, V. E.: First evaluation of prisma level 1 data for water applications, *Sensors (Switzerland)*, 20, 1–16, <https://doi.org/10.3390/s20164553>, 2020.
- 990 Gilks, W. R. and Berzuini, C.: Following a Moving Target—Monte Carlo Inference for Dynamic Bayesian Models, *Journal of the Royal Statistical Society Series B: Statistical Methodology*, 63, 127–146, <https://doi.org/10.1111/1467-9868.00280>, 2001.
- Golston, L. M., Aubut, N. F., Frish, M. B., Yang, S., Talbot, R. W., Gretencord, C., McSpiritt, J., and Zondlo, M. A.: Natural Gas Fugitive Leak Detection Using an Unmanned Aerial Vehicle: Localization and Quantification of Emission Rate, *Atmosphere*, 9, 333, <https://doi.org/10.3390/atmos9090333>, 2018.
- 995 Goopy, J., Onyango, A., Dickhoefer, U., and Butterbach-Bahl, K.: A new approach for improving emission factors for enteric methane emissions of cattle in smallholder systems of East Africa – Results for Nyando, Western Kenya, *Agricultural Systems*, 161, 72–80, <https://doi.org/10.1016/j.agsy.2017.12.004>, 2018.
- Goopy, J. P., Korir, D., Pelster, D., Ali, A. I. M., Wassie, S. E., Schlecht, E., Dickhoefer, U., Merbold, L., and Butterbach-Bahl, K.: Severe below-maintenance feed intake increases methane yield from enteric fermentation in cattle, *British Journal of Nutrition*, 123, 1239–1246, <https://doi.org/10.1017/S0007114519003350>, 2020.
- 1000 Gordon, N., Salmond, D., and Smith, A.: Novel approach to nonlinear/non-Gaussian Bayesian state estimation, *IEEE Proceedings. Part F (Radar and Signal Processing)*, 140, 107–113, <https://doi.org/10.1049/ip-f-2.1993.0015>, 1993.
- Guanter, L., Irakulis-Loitxate, I., Gorroño, J., Sánchez-García, E., Cusworth, D. H., Varon, D. J., Cogliati, S., and Colombo, R.: Mapping methane point emissions with the PRISMA spaceborne imaging spectrometer, 265, 112 671, <https://doi.org/10.1016/j.rse.2021.112671>, 2021.
- 1005 Gurm, E., Ndung'u, P., Wilkes, A., Getahun, D., Graham, M., Leitner, S., Marquardt, S., Mulat, D., Merbold, L., Worku, T., Kagai, J., and Arndt, C.: Comparison of Tier 1 and 2 methodologies for estimating intake and enteric methane emission factors from smallholder cattle systems in Africa: a case study from Ethiopia, *Animal - Open Space*, 3, 100 064, <https://doi.org/10.1016/j.anopes.2024.100064>, 2024.
- 1010 Gålfalk, M., Nilsson Pålédal, S., and Bastviken, D.: Sensitive Drone Mapping of Methane Emissions without the Need for Supplementary Ground-Based Measurements, *ACS Earth and Space Chemistry*, 5, 2668–2676, <https://doi.org/10.1021/acsearthspacechem.1c00106>, 2021.
- Hanna, S., Briggs, G. A., Hosker, R. P., and Smith, J. S.: Handbook on atmospheric diffusion, Department of Energy, <https://api.semanticscholar.org/CorpusID:128993711>, 1982.
- 1015 Hegarty, R.: Applicability of short-term emission measurements for on-farm quantification of enteric methane, *Animal*, 7, 401–408, <https://doi.org/10.1017/S1751731113000839>, 2013.
- Hutchinson, M., Oh, H., and Chen, W.-H.: A review of source term estimation methods for atmospheric dispersion events using static or mobile sensors, *Information Fusion*, <https://doi.org/10.1016/j.inffus.2016.11.010>, 2017.
- Hutchinson, M., Liu, C., and Chen, W.: Source term estimation of a hazardous airborne release using an unmanned aerial vehicle, *Journal of Field Robotics*, 36, 797–817, <https://doi.org/10.1002/rob.21844>, 2019.
- 1020 Hutchinson, M., Liu, C., Thomas, P., and Chen, W.-H.: Unmanned Aerial Vehicle-Based Hazardous Materials Response: Information-Theoretic Hazardous Source Search and Reconstruction, *IEEE Robotics & Automation Magazine*, 27, 108–119, <https://doi.org/10.1109/MRA.2019.2943006>, 2020.

- Jacob, D. J., Varon, D. J., Cusworth, D. H., Dennison, P. E., Frankenberg, C., Gautam, R., Guanter, L., Kelley, J., McKeever, J., Ott, L. E., Poulter, B., Qu, Z., Thorpe, A. K., Worden, J. R., and Duren, R. M.: Quantifying methane emissions from the global scale down to point sources using satellite observations of atmospheric methane, *Atmospheric Chemistry and Physics*, 22, 9617–9646, <https://doi.org/10.5194/acp-22-9617-2022>, 2022.
- Jaynes, E.: *Probability theory : the logic of science*, Cambridge University Press, Cambridge, ISBN 0521592712, 2003.
- Korir, D., Eckard, R., Goopy, J., Arndt, C., Merbold, L., and Marquardt, S.: Effects of replacing *Brachiaria* hay with either *Desmodium intortum* or dairy concentrate on animal performance and enteric methane emissions of low-yielding dairy cows, *Frontiers in Animal Science*, 3, 963 323, <https://doi.org/10.3389/fanim.2022.963323>, 2022a.
- Korir, D., Marquardt, S., Eckard, R., Sanchez, A., Dickhoefer, U., Merbold, L., Butterbach-Bahl, K., Jones, C., Robertson-Dean, M., and Goopy, J.: Weight gain and enteric methane production of cattle fed on tropical grasses, *Animal Production Science*, 63, 120–132, <https://doi.org/10.1071/AN21327>, 2022b.
- Lan, X., Thoning, K., and Dlugokencky, E.: Trends in globally-averaged CH<sub>4</sub>, N<sub>2</sub>O, and SF<sub>6</sub> determined from NOAA Global Monitoring Laboratory measurements, <https://doi.org/https://doi.org/10.15138/P8XG-AA10>, 2024.
- Leitner, S. M., Carbonell, V., Mhindu, R. L., Zhu, Y., Mutuo, P., Butterbach-Bahl, K., and Merbold, L.: Greenhouse gas emissions from cattle enclosures in semi-arid sub-Saharan Africa: The case of a rangeland in South-Central Kenya, 367, 108 980, <https://doi.org/10.1016/j.agee.2024.108980>, 2024.
- Loisy, A. and Eloy, C.: Searching for a source without gradients: how good is infotaxis and how to beat it, *Proceedings of the Royal Society A: Mathematical, Physical and Engineering Sciences*, 478, 20220 118, <https://doi.org/10.1098/rspa.2022.0118>, 2022.
- Loizzo, R., Guarini, R., Longo, F., Scopa, T., Formaro, R., Facchinetti, C., and Varacalli, G.: PRISMA: The Italian hyperspectral mission, in: *IGARSS 2018-2018 IEEE international geoscience and remote sensing symposium*, pp. 175–178, 2018.
- Moorhead, J. G.: *THE NEAR INFRARED ABSORPTION SPECTRUM OF METHANE*, 1932.
- Morales, R., Ravelid, J., Vinkovic, K., Korbeñ, P., Tuzson, B., Emmenegger, L., Chen, H., Schmidt, M., Humbel, S., and Brunner, D.: Controlled-release experiment to investigate uncertainties in UAV-based emission quantification for methane point sources, *Atmospheric Measurement Techniques*, 15, 2177–2198, <https://doi.org/10.5194/amt-15-2177-2022>, 2022.
- Mwangi, P. M., Eckard, R., Gluecks, I., Merbold, L., Mulat, D. G., Gakige, J., Pinares-Patino, C. S., and Marquardt, S.: Impact of *Haemonchus contortus* infection on feed intake, digestion, liveweight gain, and enteric methane emission from Red Maasai and Dorper sheep, *Frontiers in Animal Science*, 4, 1212 194, <https://doi.org/10.3389/fanim.2023.1212194>, 2023.
- Nathan, B. J., Golston, L. M., O'Brien, A. S., Ross, K., Harrison, W. A., Tao, L., Lary, D. J., Johnson, D. R., Covington, A. N., Clark, N. N., and Zondlo, M. A.: Near-Field Characterization of Methane Emission Variability from a Compressor Station Using a Model Aircraft, *Environmental Science & Technology*, 49, 7896–7903, <https://doi.org/10.1021/acs.est.5b00705>, 2015.
- Ndung'u, P. W., Bebe, B. O., Ondiek, J. O., Butterbach-Bahl, K., Merbold, L., and Goopy, J. P.: Improved region-specific emission factors for enteric methane emissions from cattle in smallholder mixed crop: livestock systems of Nandi County, Kenya, *Animal Production Science*, 59, 1136, <https://doi.org/10.1071/AN17809>, 2019.
- Nielsen, M. O., Kiani, A., Tejada, E., Chwalibog, A., and Alstrup, L.: Energy metabolism and methane production in llamas, sheep and goats fed high- and low-quality grass-based diets, *Archives of Animal Nutrition*, 68, 171–185, <https://doi.org/10.1080/1745039X.2014.912039>, 2014.
- Pandey, S., Gautam, R., Houweling, S., Van Der Gon, H. D., Sadavarte, P., Borsdorff, T., Hasekamp, O., Landgraf, J., Tol, P., Van Kempen, T., Hoogeveen, R., Van Hees, R., Hamburg, S. P., Maasakkers, J. D., and Aben, I.: Satellite observations reveal ex-

- treme methane leakage from a natural gas well blowout, *Proceedings of the National Academy of Sciences*, 116, 26376–26381, <https://doi.org/10.1073/pnas.1908712116>, 2019.
- Park, M., An, S., Seo, J., and Oh, H.: Autonomous Source Search for UAVs Using Gaussian Mixture Model-Based In-
- 1065 fotaxis: Algorithm and Flight Experiments, *IEEE Transactions on Aerospace and Electronic Systems*, 57, 4238–4254, <https://doi.org/10.1109/TAES.2021.3098132>, 2021.
- Pasquill, F.: The Estimation of the Dispersion of Windborne Material, *Meteorological Magazine*, 1961.
- Paustian, K., Ravindranath, N., and van Amstel, A.: 2006 IPCC Guidelines for National Greenhouse Gas Inventories, no. Part 2 in Volume 4: Agriculture, Forestry and Other Land Use, [s.n.], 2006.
- 1070 Pei, Z., Han, G., Mao, H., Chen, C., Shi, T., Yang, K., Ma, X., and Gong, W.: Improving quantification of methane point source emissions from imaging spectroscopy, *Remote Sensing of Environment*, 295, 113652, <https://doi.org/10.1016/j.rse.2023.113652>, 2023.
- Pinares-Patiño, C. S., Ulyatt, M. J., Waghorn, G. C., Lassey, K. R., Barry, T. N., Holmes, C. W., and Johnson, D. E.: Methane emission by alpaca and sheep fed on lucerne hay or grazed on pastures of perennial ryegrass/white clover or birdsfoot trefoil, *The Journal of Agricultural Science*, 140, 215–226, <https://doi.org/10.1017/S002185960300306X>, 2003.
- 1075 Pirk, N., Aalstad, K., Westermann, S., Vatne, A., van Hove, A., Tallaksen, L. M., Cassiani, M., and Katul, G.: Inferring surface energy fluxes using drone data assimilation in large eddy simulations, *Atmospheric Measurement Techniques*, <https://doi.org/10.5194/amt-15-7293-2022>, 2022.
- Prather, M. J., Holmes, C. D., and Hsu, J.: Reactive greenhouse gas scenarios: Systematic exploration of uncertainties and the role of atmospheric chemistry, *Geophysical Research Letters*, 39, <https://doi.org/10.1029/2012gl051440>, publisher: American Geophysical Union
- 1080 (AGU), 2012.
- Rao, K. S.: Uncertainty Analysis in Atmospheric Dispersion Modeling, *Pure and Applied Geophysics*, 162, 1893–1917, <https://doi.org/10.1007/s00024-005-2697-4>, 2005.
- Roger, J., Guanter, L., Gorroño, J., and Irakulis-Loitxate, I.: Exploiting the entire near-infrared spectral range to improve the de-
- 1085 tection of methane plumes with high-resolution imaging spectrometers, *Atmospheric Measurement Techniques*, 17, 1333–1346, <https://doi.org/10.5194/amt-17-1333-2024>, 2024a.
- Roger, J., Irakulis-Loitxate, I., Valverde, A., Gorroño, J., Chabrilat, S., Brell, M., and Guanter, L.: High-Resolution Methane Map- ping With the EnMAP Satellite Imaging Spectroscopy Mission, *IEEE Transactions on Geoscience and Remote Sensing*, 62, 1–12, <https://doi.org/10.1109/TGRS.2024.3352403>, 2024b.
- Sanz-Alonso, D.: Inverse problems and data assimilation, vol. 107 of *London Mathematical Society student texts* ;, Cambridge University
- 1090 Press, Cambridge, 1st ed. edn., ISBN 1-009-41433-X, 2023.
- Saunois, M., Stavert, A. R., Poulter, B., Bousquet, P., Canadell, J. G., Jackson, R. B., Raymond, P. A., Dlugokencky, E. J., Houweling, S., Patra, P. K., Ciais, P., Arora, V. K., Bastviken, D., Bergamaschi, P., Blake, D. R., Brailsford, G., Bruhwiler, L., Carlson, K. M., Carrol, M., Castaldi, S., Chandra, N., Crevoisier, C., Crill, P. M., Covey, K., Curry, C. L., Etiope, G., Frankenberg, C., Gedney, N., Hegglin, M. I., Höglund-Isaksson, L., Hugelius, G., Ishizawa, M., Ito, A., Janssens-Maenhout, G., Jensen, K. M., Joos, F., Kleinen, T., Krummel, P. B., Langenfelds, R. L., Laruelle, G. G., Liu, L., Machida, T., Maksyutov, S., McDonald, K. C., McNorton, J., Miller, P. A., Melton, J. R., Morino, I., Müller, J., Murguía-Flores, F., Naik, V., Niwa, Y., Noce, S., O'Doherty, S., Parker, R. J., Peng, C., Peng, S., Peters, G. P., Prigent, C., Prinn, R., Ramonet, M., Regnier, P., Riley, W. J., Rosentretter, J. A., Segers, A., Simpson, I. J., Shi, H., Smith, S. J., Steele, L. P., Thornton, B. F., Tian, H., Tohjima, Y., Tubiello, F. N., Tsuruta, A., Viovy, N., Voulgarakis, A., Weber, T. S., Van Weele, M., Van Der Werf, G. R., Weiss, R. F., Worthy, D., Wunch, D., Yin, Y., Yoshida, Y., Zhang, W., Zhang, Z., Zhao, Y., Zheng, B., Zhu, Q., Zhu, Q., and Zhuang,

- 1100 Q.: The Global Methane Budget 2000–2017, *Earth System Science Data*, 12, 1561–1623, <https://doi.org/10.5194/essd-12-1561-2020>, 2020.
- Scafutto, R. D. P. M., van der Werff, H., Bakker, W. H., van der Meer, F., and de Souza Filho, C. R.: An evaluation of airborne SWIR imaging spectrometers for CH<sub>4</sub> mapping: Implications of band positioning, spectral sampling and noise, *International Journal of Applied Earth Observation and Geoinformation*, 94, <https://doi.org/10.1016/j.jag.2020.102233>, 2021.
- 1105 Shah, A., Allen, G., Pitt, J. R., Ricketts, H., Williams, P. I., Helmore, J., Finlayson, A., Robinson, R., Kabbabe, K., Hollingsworth, P., Rees-White, T. C., Beaven, R., Scheutz, C., and Bourn, M.: A Near-Field Gaussian Plume Inversion Flux Quantification Method, Applied to Unmanned Aerial Vehicle Sampling, *Atmosphere*, 10, 396, <https://doi.org/10.3390/atmos10070396>, 2019.
- Shah, A., Pitt, J. R., Ricketts, H., Leen, J. B., Williams, P. I., Kabbabe, K., Gallagher, M. W., and Allen, G.: Testing the near-field Gaussian plume inversion flux quantification technique using unmanned aerial vehicle sampling, *Atmospheric Measurement Techniques*, 13, 1467–1484, <https://doi.org/10.5194/amt-13-1467-2020>, 2020.
- 1110 Sherwin, E., Rutherford, J., Chen, Y., Aminfard, S., Kort, E., Jackson, R., and Brandt, A.: Single-blind validation of spacebased point-source methane emissions detection and quantification, *Scientific Reports*, <https://doi.org/10.1038/s41598-023-30761-2>, 2023.
- Student: The probable error of a mean, *Biometrika*, pp. 1–25, 1908.
- Stull, R. B.: An introduction to boundary layer meteorology, *Atmospheric sciences library*, Kluwer Academic Publishers, Dordrecht, 2nd reprint. edn., ISBN 9027727686, 1989.
- 1115 Sutton, O.: The theoretical distribution of airborne pollution from factory chimneys, *Quarterly Journal of the Royal Meteorological Society*, <https://doi.org/10.1002/qj.49707331715>, 1947.
- Szopa, S., Naik, V., Adhikary, B., Artaxo, P., Bernsten, T., Collins, W., Fuzzi, S., Gallardo, L., Kiendler-Scharr, A., Klimont, Z., Liao, H., Unger, N., , and Zanis, P.: Short-Lived Climate Forcers, in: *Climate Change 2021: The Physical Science Basis. Contribution of Working Group I to the Sixth Assessment Report of the Intergovernmental Panel on Climate Change*, edited by Masson-Delmotte, V., Zhai, P., Pirani, A., Connors, S., Péan, C., Berger, S., Caud, N., Chen, Y., Goldfarb, L., Gomis, M., Huang, M., Leitzell, K., Lonnoy, E., Matthews, J., Maycock, T., Waterfield, T., Yelekçi, O., Yu, R., , and Zhou, B., p. 817–922, Cambridge University Press, Cambridge, United Kingdom and New York, NY, USA, <https://doi.org/10.1017/9781009157896.008>, 2021.
- Särkkä, S. and Svensson, L.: *Bayesian Filtering and Smoothing*, Cambridge University Press, 2 edn., <https://doi.org/10.1017/9781108917407>, 2023.
- 1125 Thompson, R. L., Groot Zwaafink, C. D., Brunner, D., Tsuruta, A., Aalto, T., Raivonen, M., Crippa, M., Solazzo, E., Guizzardi, D., Regnier, P., and Maisonnier, M.: Effects of extreme meteorological conditions in 2018 on European methane emissions estimated using atmospheric inversions, *Philosophical Transactions of the Royal Society A: Mathematical, Physical and Engineering Sciences*, 380, 20200443, <https://doi.org/10.1098/rsta.2020.0443>, 2022.
- 1130 van Hove, A., Aalstad, K., and Pirk, N.: Inferring methane emissions from African livestock by fusing drone, tower, and satellite data, <https://doi.org/10.5281/zenodo.14214699>, Zenodo dataset, 2024a.
- van Hove, A., Aalstad, K., and Pirk, N.: Guiding drones by information gain, in: *Proceedings of the 5th Northern Lights Deep Learning Conference (NLDL)*, edited by Lutchyn, T., Ramírez Rivera, A., and Ricaud, B., vol. 233 of *Proceedings of Machine Learning Research*, pp. 89–96, PMLR, <https://proceedings.mlr.press/v233/hove24a.html>, 2024b.
- 1135 van Leeuwen, P. J.: Representation errors and retrievals in linear and nonlinear data assimilation, *Quarterly Journal of the Royal Meteorological Society*, 141, 1612–1623, <https://doi.org/10.1002/qj.2464>, 2015.



- Varon, D. J., Jacob, D. J., McKeever, J., Jervis, D., Durak, B. O. A., Xia, Y., and Huang, Y.: Quantifying methane point sources from fine-scale satellite observations of atmospheric methane plumes, *Atmospheric Measurement Techniques*, 11, 5673–5686, <https://doi.org/10.5194/amt-11-5673-2018>, 2018.
- 1140 Vecchi, N. T., Mellqvist, J., and Scheutz, C.: Quantification of methane emissions from cattle farms, using the tracer gas dispersion method, *Agriculture, Ecosystems & Environment*, 330, 107 885, <https://doi.org/10.1016/j.agee.2022.107885>, 2022.
- Vergassola, M., Villermaux, E., and Shraiman, B. I.: ‘Infotaxis’ as a strategy for searching without gradients, *Nature*, <https://doi.org/10.1038/nature05464>, 2007.
- Vergé, C., Dubarry, C., Del Moral, P., and Moulines, E.: On parallel implementation of sequential Monte Carlo methods: the island particle  
1145 model, *Statistics and Computing*, 25, 243–260, <https://doi.org/10.1007/s11222-013-9429-x>, 2015.
- Villa, T., Gonzalez, F., Miljievic, B., Ristovski, Z., and Morawska, L.: An Overview of Small Unmanned Aerial Vehicles for Air Quality Measurements: Present Applications and Future Prospectives, *Sensors*, 16, 1072, <https://doi.org/10.3390/s16071072>, 2016.
- Vinković, K., Andersen, T., De Vries, M., Kers, B., Van Heuven, S., Peters, W., Hensen, A., Van Den Bulk, P., and Chen, H.: Evaluating the use of an Unmanned Aerial Vehicle (UAV)-based active AirCore system to quantify methane emissions from dairy cows, *Science of The  
1150 Total Environment*, 831, 154 898, <https://doi.org/10.1016/j.scitotenv.2022.154898>, 2022.
- Western, L. M., Ramsden, A. E., Ganesan, A. L., Boesch, H., Parker, R. J., Scarpelli, T. R., Tunnicliffe, R. L., and Rigby, M.: Estimates of North African Methane Emissions from 2010 to 2017 Using GOSAT Observations, *Environmental Science & Technology Letters*, 8, 626–632, <https://doi.org/10.1021/acs.estlett.1c00327>, 2021.
- Wolz, K., Leitner, S., Merbold, L., Wolf, B., and Mauder, M.: Enteric methane emission estimates for Kenyan cattle in a night-  
1155 time enclosure using a backward Lagrangian Stochastic dispersion technique, *Theoretical and Applied Climatology*, 147, 1091–1103, <https://doi.org/10.1007/s00704-021-03868-7>, 2022.
- Wratt, D. S., Gimson, N. R., Brailsford, G. W., Lassey, K. R., Bromley, A. M., and Bell, M. J.: Estimating regional methane emissions from agriculture using aircraft measurements of concentration profiles, *Atmospheric Environment*, 2001.
- Xiao, C., Fu, B., Shui, H., Guo, Z., and Zhu, J.: Detecting the sources of methane emission from oil shale mining and processing using  
1160 airborne hyperspectral data, *Remote Sensing*, 12, <https://doi.org/10.3390/rs12030537>, 2020.
- Yang, S., Talbot, R. W., Frish, M. B., Golston, L. M., Aubut, N. F., Zondlo, M. A., Gretencord, C., and McSpirt, J.: Natural Gas Fugitive Leak Detection Using an Unmanned Aerial Vehicle: Measurement System Description and Mass Balance Approach, *Atmosphere*, 9, 383, <https://doi.org/10.3390/atmos9100383>, 2018.

**Table B1.** Overview of methane emission rate estimates obtained by the mass balance method, the Bayesian inference method, and the IPCC Tier 2 workflow with  $\pm 20\% \pm 20\%$  uncertainty range (Paustian et al., 2006). The cases are defined as: (a) using concentration observations, (b) using concentration observations and mean wind speed data from the drone, (c) using concentration observations and mean wind speed, mean wind direction and diffusivity data derived from Monin Obukhov Similarity Theory. Emission rate estimates are given in  $q_{[g\ h^{-1}]}Q_{[g\ h^{-1}]}$ , where  $hd$  is short for head, except for the last column which presents estimates in  $Q_{[g\ h^{-1}]}Q_{[g\ h^{-1}]}$ , i.e. for the entire herd. One standard deviation uncertainty is reported. Dates of drone flights are denoted by [DD/MM]; AM and PM indicate drone flights conducted in the morning before feeding and in the afternoon after feeding, respectively. Wind speed ( $V_{EC} [ms^{-1}]V_{EC} [ms^{-1}]$ ) and wind direction ( $\phi_{EC} [^\circ]\phi_{EC} [^\circ]$ ) data are from the flux tower during the mass balance flight. Further notation: (♠) Unreliable drone flight results due to unfavorable wind conditions (following Yang et al. (2018)); (♣) Unreliable estimates due to a low signal-to-noise ratio caused by a weak emission source; (♠) Estimates using a narrower prior for wind direction:  $\mathcal{U}(30, 135)$ ; (♣) IPCC Tier 1 value with  $\pm 50\% \pm 50\%$  uncertainty range (Paustian et al., 2006).

| Date     | Herd           |       | Wind                |                 | Mass balance                          |  | Bayesian inference                    |                                       |                                       | IPCC Tier 2 value                     |                        |
|----------|----------------|-------|---------------------|-----------------|---------------------------------------|--|---------------------------------------|---------------------------------------|---------------------------------------|---------------------------------------|------------------------|
|          | Animals        | Count | V <sub>EC</sub>     | φ <sub>EC</sub> | q                                     |  | q, case a                             | q, case b                             | q, case c                             | q                                     | Q                      |
| [DD/MM]  | [-]            | [-]   | [ms <sup>-1</sup> ] | [°]             | [g hd <sup>-1</sup> h <sup>-1</sup> ] |  | [g hd <sup>-1</sup> h <sup>-1</sup> ] | [g hd <sup>-1</sup> h <sup>-1</sup> ] | [g hd <sup>-1</sup> h <sup>-1</sup> ] | [g hd <sup>-1</sup> h <sup>-1</sup> ] | [g h <sup>-1</sup> ]   |
| 02/03 AM | cows           | 101   | 3.5 ± 0.9           | 27 ± 24         | 18.3 ± 2.5                            |  | 18.7 ± 4.7                            | 11.9 ± 1.7                            | 13.0 ± 1.4                            | 10.0 ± 2.0                            | 1,005 ± 201            |
| 02/03 PM | cows           | 101   | 5.2 ± 1.5           | 56 ± 16         | 10.6 ± 3.1                            |  | 15.1 ± 2.8                            | 13.0 ± 1.5                            | 17.4 ± 1.5                            | 10.0 ± 2.0                            | 1,005 ± 201            |
| 02/03 AM | heifers        | 208   | 3.7 ± 0.8           | 61 ± 21         | 5.2 ± 1.3                             |  | 6.5 ± 1.7                             | 4.4 ± 0.8                             | 4.5 ± 0.6                             | 6.9 ± 1.4                             | 1,438 ± 288            |
| 02/03 PM | heifers        | 208   | 5.7 ± 1.3           | 66 ± 11         | 5.9 ± 1.4                             |  | 13.3 ± 3.0                            | 12.0 ± 2.0                            | 13.5 ± 1.3                            | 6.9 ± 1.4                             | 1,438 ± 288            |
| 06/03 AM | heifers        | 206   | 3.9 ± 0.9           | 48 ± 13         | 5.1 ± 1.3                             |  | 4.6 ± 1.3                             | 3.1 ± 0.9                             | 4.0 ± 0.5                             | 6.9 ± 1.4                             | 1,425 ± 285            |
| 06/03 PM | heifers        | 206   | 5.8 ± 1.5           | 70 ± 14         | 8.2 ± 1.7                             |  | 7.2 ± 1.4                             | 5.4 ± 0.8                             | 7.4 ± 0.7                             | 6.9 ± 1.4                             | 1,425 ± 285            |
| 05/03 AM | steers         | 127   | 4.9 ± 1.1           | 61 ± 12         | 9.5 ± 2.1                             |  | 6.1 ± 1.6                             | 4.0 ± 0.8                             | 5.7 ± 0.9                             | 5.6 ± 1.1                             | 710 ± 142              |
| 05/03 PM | steers         | 127   | 6.7 ± 1.6           | 53 ± 13         | 7.4 ± 2.5                             |  | 8.1 ± 2.3                             | 7.5 ± 1.3                             | 8.5 ± 1.1                             | 5.6 ± 1.1                             | 710 ± 142              |
| 03/03 AM | slick herd     | 148   | 2.0 ± 0.9           | 354 ± 59        | 3.3 ± 2.2 <sup>♦</sup>                |  | 11.4 ± 3.8                            | 6.9 ± 2.4                             | 7.0 ± 1.1                             | 10.4 ± 2.1                            | 1,539 ± 308            |
| 03/03 PM | slick herd     | 148   | 4.9 ± 1.4           | 55 ± 23         | 12.5 ± 2.1                            |  | 12.5 ± 3.6                            | 7.5 ± 1.2                             | 11.9 ± 1.1                            | 10.4 ± 2.1                            | 1,539 ± 308            |
| 04/03 AM | camels         | 42    | 1.7 ± 0.7           | 289 ± 47        | -2.6 ± 7.4 <sup>♦</sup>               |  | 3.4 ± 2.3                             | 2.8 ± 1.7                             | 2.3 ± 1.2                             | 5.3 ± 2.6 <sup>★</sup>                | 231 ± 116 <sup>★</sup> |
| 04/03 PM | camels         | 42    | 4.3 ± 1.4           | 58 ± 28         | 8.4 ± 6.9                             |  | 12.9 ± 4.5                            | 8.8 ± 2.8                             | 11.0 ± 2.3                            | 5.3 ± 2.6 <sup>★</sup>                | 231 ± 116 <sup>★</sup> |
| 07/03 AM | lactating ewes | 173   | 3.1 ± 1.3           | 83 ± 26         | 0.2 ± 0.7 <sup>▲</sup>                |  | 0.9 ± 0.4                             | 0.8 ± 0.3                             | 0.9 ± 0.3                             | 0.6 ± 0.1                             | 112 ± 22               |
| 07/03 PM | lactating ewes | 173   | 4.3 ± 1.4           | 90 ± 26         | 4.2 ± 1.4 <sup>▲</sup>                |  | 0.8 ± 0.4                             | 0.7 ± 0.3                             | 0.8 ± 0.3                             | 0.6 ± 0.1                             | 112 ± 22               |
| 01/03 AM | dry does       | 197   | 2.4 ± 0.7           | 60 ± 35         | 4.8 ± 1.3 <sup>♦,▲</sup>              |  | 0.8 ± 0.5 <sup>•</sup>                | 0.7 ± 0.4 <sup>•</sup>                | 0.5 ± 0.3                             | 0.7 ± 0.1                             | 141 ± 28               |
| 01/03 PM | dry does       | 197   | 4.6 ± 1.3           | 46 ± 21         | 3.9 ± 1.5 <sup>▲</sup>                |  | 1.7 ± 0.7 <sup>•</sup>                | 1.5 ± 0.6 <sup>•</sup>                | 1.8 ± 0.5                             | 0.7 ± 0.1                             | 141 ± 28               |
| 29/02 PM | pregnant does  | 124   | 5.6 ± 1.3           | 51 ± 17         | 0.8 ± 2.7 <sup>▲</sup>                |  | 1.3 ± 0.8 <sup>•</sup>                | 1.1 ± 0.6 <sup>•</sup>                | 1.3 ± 0.7                             | 0.6 ± 0.1                             | 74 ± 15                |
| 07/03 AM | pregnant does  | 124   | 1.4 ± 0.6           | 12 ± 67         | 1.7 ± 1.5 <sup>♦,▲</sup>              |  | 0.8 ± 0.6                             | 0.6 ± 0.4                             | 0.7 ± 0.3                             | 0.6 ± 0.1                             | 74 ± 15                |
| 07/03 PM | pregnant does  | 124   | 4.2 ± 1.3           | 62 ± 28         | 4.2 ± 1.9 <sup>▲</sup>                |  | 1.2 ± 1.2                             | 1.2 ± 1.0                             | 1.0 ± 0.5                             | 0.6 ± 0.1                             | 74 ± 15                |
| 01/03 AM | weaner kids    | 118   | 3.6 ± 1.1           | 58 ± 15         | 5.0 ± 1.9 <sup>▲</sup>                |  | 0.8 ± 0.6 <sup>•</sup>                | 0.6 ± 0.4 <sup>•</sup>                | 0.7 ± 0.5                             | 0.7 ± 0.1                             | 79 ± 16                |
| 01/03 PM | weaner kids    | 118   | 6.2 ± 1.4           | 49 ± 12         | 11.1 ± 2.3 <sup>▲</sup>               |  | 0.8 ± 0.6 <sup>•</sup>                | 0.8 ± 0.6 <sup>•</sup>                | 0.9 ± 0.6                             | 0.7 ± 0.1                             | 79 ± 16                |
